# Supplementary material for: Synchronized partial metal leaching and amphoteric N–P modification in MnO2 and VOx pseudocapacitor beyond its energy density limit
Source: Royal Society of Chemistry journal article supplement (doi:10.1039/d2ta08157a), 2022-11-25
Supplement: d2ta08157a1.pdf [file d2ta08157a1.pdf]

Supporting information

**Synchronized Partial Metal Leaching and Amphoteric N–P Modification in MnO<sub>2</sub> and VO<sub>x</sub>  
Pseudocapacitor beyond its Energy Density Limit**

## Experimental section

**Material characterization:** The structure, morphology, phases and surface chemistry of samples were investigated by field-emission SEM (Hitachi S-4800) with EDS, TEM (HEOL JEM-2010), XRD (D8-advance with Cu K $\alpha$  radiation source), XPS (AXIS-HSi), and Raman spectroscopy (Thermo DXR2xi). The BET surface area results were derived from the N<sub>2</sub> adsorption-desorption isotherms measured from BELSORP-mini. ICP (730 Series) was used to identify the ratio of Mn/Mo. X-ray absorption fine spectroscopy (XAFS) at the Mn K-edge was performed at beamline 7D of the Pohang Accelerator Laboratory (PAL) in Korea. The storage ring was operated at 3.0 GeV, with a ring current of 240–250 mA. A Si(1 1 1) double crystal monochromator was used to eliminate high-order harmonics by reducing the beamline intensity by 20–30%. K-edge energy calibration was used by the first maximum point of derivative of the absorption curve in the Mn metal reference foil. The K-edge XAS spectra of Mn were collected from the 7D beamline at PLSII. Reference Mn metal foil spectrum was used to calibrate the spectra of samples, followed by analysis using Athena software in Demeter package. The EXAFS was investigated by Fourier transformation of the post-edge lines from each metal, and the Fourier transformed spectra were plotted using an uncorrected distance scale. The k range of 3–10 and k-weight of 3 were used with a window range of 1.0 to 3 to fit EXAFS results by using Artemis software in Demeter package.<sup>1</sup> The agreement values (R factor) obtained between simulated and observed data were ~0.02 in all cases.

**Preparation of Mo, F-doped MnO<sub>2</sub> (MMO):** All reagents were purchased from Sigma-Aldrich. Carbon cloth (CC) (NARA Cell-Tech Corporation) was annealed at 500 °C for 2 h under air atmosphere to endow it with favorable hydrophilicity. First, 10 mL of mixed solution containing 20 mM KMnO<sub>4</sub>, 6.25 mM (NH<sub>4</sub>)<sub>6</sub>Mo<sub>7</sub>O<sub>24</sub>·4H<sub>2</sub>O and 78.8 mmol NH<sub>4</sub>F was prepared. Then, the

solution was transferred to a Teflon-lined stainless steel autoclave, followed by dipping a piece of air-activated CC. The mixture was heat to 160 °C and maintained for 2 h in an electrical oven. After the autoclave cooled down to room temperature, MMO deposited on CC was washed with DI water at least three times and then dried in air. Mo-MnO<sub>2</sub> and F-doped MnO<sub>2</sub> were prepared by the same procedure without NH<sub>4</sub>F and (NH<sub>4</sub>)<sub>6</sub>Mo<sub>7</sub>O<sub>24</sub>·4H<sub>2</sub>O, respectively. MnO<sub>2</sub> was synthesized the same method without any dopant. MMO-25 sample was prepared using 25 mmol KMnO<sub>4</sub>, 7.81 mmol (NH<sub>4</sub>)<sub>6</sub>Mo<sub>7</sub>O<sub>24</sub>·4H<sub>2</sub>O and 98.4 mmol NH<sub>4</sub>F.

**Preparation of activated MMO (A-MMO):** A piece of MMO was placed in 10 mL of DI water in a Teflon-lined stainless steel autoclave, which was then heated to 140 °C and maintained for 2 h in an electrical oven. After the autoclave cooled down to room temperature, the A-MMO sample was washed with DI water and dried in air. A-MMO-25 was fabricated by treating MMO-25 using the same method. MnO<sub>2</sub> was activated by the same method to obtain A-MnO<sub>2</sub>. To investigate the effect of hydrothermal activation time on the morphology of derived samples, controlled A-MMO-4 and A-MMO-6 samples were prepared by controlling hydrothermal time for 4 and 6 h, respectively. To investigate the effect of the activation temperature on the electrochemical performance, A-MMO-120 and A-MMO-160 were activated at 120 and 160 °C, respectively. The mass loading of MMO, A-MMO and A-MMO-25 was measured to be 7.1, 6.4 and 8.5 mg cm<sup>-2</sup>, respectively.

**Preparation of N-doped graphene (NG):** NG nanosheet was fabricated by one-step hydrothermal method.<sup>2</sup> Graphene oxide (GO) was first prepared by a Hummers' method. 40 mg of GO was dispersed in 10 mL of DI water and then sonicated for 30 min. Then, 0.8 g of NH<sub>4</sub>H<sub>2</sub>PO<sub>4</sub> was added to the above GO solution. The mixture was transferred into a Teflon-lined stainless steel autoclave and then heated to 180 °C and maintained for 2 h. Afterward, the resulting product was

washed with DI water three times and then freeze-dried. To prepare flexible NG-based electrode, a slurry was prepared by mixing NG with Super P and polyvinylidene fluoride with a mass ratio of 8:1:1 in N-methyl-2-pyrrolidone. The obtained slurry was carefully coated onto CC and dried at 60 °C in a vacuum oven overnight. The mass loading of NG on CC is around 14 mg cm<sup>-2</sup>.

**Preparation of N-VO<sub>x</sub>, P-VO<sub>x</sub> and N, P-VO<sub>x</sub>:** First, V<sub>2</sub>O<sub>5</sub> nanowires were electrochemically deposited on CC at 0.7 V for 40 min, in which Pt and saturated calomel electrodes were applied as a counter electrode and a reference electrode, respectively. An aqueous solution containing 0.4 M vanadyl sulfate and 0.4 M ammonium acetate was used as the electrolyte. The electrodeposited V<sub>2</sub>O<sub>5</sub> (E-V<sub>2</sub>O<sub>5</sub>) was washed with DI water three times and dried in air. To prepare a sample with high mass loading, the electrodeposition time was increased to 60 min, generating E-V<sub>2</sub>O<sub>5</sub>-60. Thereafter, 0.8 g of CH<sub>4</sub>N<sub>2</sub>O and 0.8 g of NaH<sub>2</sub>PO<sub>2</sub>·H<sub>2</sub>O were used as N and P precursors placed at two corundum crucibles, respectively. They were put at the upstream side in a tube furnace, while electrodeposited V<sub>2</sub>O<sub>5</sub> was put at the downstream site. E-V<sub>2</sub>O<sub>5</sub> was annealed in the presence of N and P precursors under Ar atmosphere to 400 °C with a heating rate of 2 °C min<sup>-1</sup> and maintained for 2 h, leading to the formation of N, P-VO<sub>x</sub>. The N, P-VO<sub>x</sub>-60 sample was prepared by annealing E-V<sub>2</sub>O<sub>5</sub>-60 under the same condition. The V<sub>2</sub>O<sub>5</sub> sample was fabricated by annealing E-V<sub>2</sub>O<sub>5</sub> with the absence of N and P precursors. N-VO<sub>x</sub> and P-VO<sub>x</sub> samples were prepared by thermal treatment with the presence of either CH<sub>4</sub>N<sub>2</sub>O or NaH<sub>2</sub>PO<sub>2</sub>·H<sub>2</sub>O, respectively. The mass loading of N, P-VO<sub>x</sub> and N, P-VO<sub>x</sub>-60 was measured to be 6.1 and 10.1 mg cm<sup>-2</sup>, respectively.

**Electrochemical measurement:** CV, EIS, GCD curves and cycling stability of all electrodes were collected by CHI660E at a three-electrode system using 1 M Na<sub>2</sub>SO<sub>4</sub> electrolyte. A platinum mesh and Ag/AgCl electrode were employed as a counter electrode as well as a reference electrode, respectively. The area of the working electrode was 1.0 cm<sup>2</sup>. EIS data of electrodes were measured

within a frequency range of 0.1–100 kHz at an open-circuit AC with 5 mV amplitude. The flexible A-MMO//N, P-VO<sub>x</sub>, A-MMO-25//N, P-VO<sub>x</sub>-60, MMO//N, P-VO<sub>x</sub>, and A-MMO//NG devices were assembled using gel electrolyte, and filter paper was applied as a separator. To prepare the gel electrolyte, 3 g PVA and 1.5 g Na<sub>2</sub>SO<sub>4</sub> were added to 30 mL of DI water, which was then heated at 90 °C for at least 3 h under vigorous stirring to obtain PVA/Na<sub>2</sub>SO<sub>4</sub> gel electrolyte. The total volume of the A-MMO//N, P-VO<sub>x</sub>, A-MMO-25//N, P-VO<sub>x</sub>-60, MMO//N, P-VO<sub>x</sub>, and A-MMO//NG devices was measured to be 0.08 cm<sup>3</sup> (1 × 1 × 0.08), 0.09 cm<sup>3</sup> (1 × 1 × 0.09), 0.09 cm<sup>3</sup> (1 × 1 × 0.09), and 0.1 cm<sup>3</sup> (1 × 1 × 0.1), respectively.

### **The method for calculating electrochemical performance**

**The areal capacitance of flexible electrodes in a three-electrode test:** The areal capacitance of all electrodes (*C*) was calculated according to Eq. S1:

$$C = \frac{I \times \Delta t}{A \times V} \quad (\text{Eq. S1})$$

where *C* (mF cm<sup>-2</sup>), *A* (cm<sup>2</sup>), *I* (mA) and  $\Delta t$  (s) are the areal capacitance, testing area, current density, and discharge time.

**Charge balance of positive and negative electrodes for flexible SCs:** Charges (*Q*) stored at the positive and negative electrodes are calculated via Eq. S2 and S3:

$$Q_- = C_{a,-} \times \Delta V \times A_- \quad (\text{Eq. S2})$$

$$Q_+ = C_{a,+} \times \Delta V \times A_+ \quad (\text{Eq. S3})$$

$C$ ,  $A$ , and  $\Delta V$  refer to the areal capacitance, tested area, as well as potential window of the electrode, respectively. The value of  $Q_+$  should be equal to that of  $Q_-$  to maintain the charge balance of both electrodes. Therefore, their areal capacitance is described in Eq. S4:

$$\frac{C_{a,-}}{C_{a,+}} = \frac{\Delta V_+ \times A_+}{\Delta V_- \times A_-} \quad (\text{Eq. S4})$$

$\Delta V_+$  and  $\Delta V_-$  of the positive and negative electrodes are 1.1 and 1.2 V, respectively.  $A_+$  and  $A_-$  refer to the testing area of the positive and negative electrodes (1.0 cm<sup>2</sup>).

**The areal and volumetric capacitance of flexible SCs:** The areal and volumetric capacitance of flexible SCs is calculated from Eq. S5 and S6:

$$C_a = \frac{I \times \Delta t}{\Delta V \times A} \quad (\text{Eq. S5})$$

$$C_v = \frac{C_a}{V} \quad (\text{Eq. S6})$$

$C_a$  (mF cm<sup>-2</sup>) and  $C_v$  (mF cm<sup>-3</sup>) refer to the areal and volumetric capacitance of the SC.  $A$  and  $V$  represent the area (cm<sup>2</sup>) and volume (cm<sup>3</sup>) of the flexible SC.  $\Delta V$ ,  $\Delta t$  and  $I$  are denoted as the voltage window (V), discharging time (s), and current (mA).

**Energy density and power density of flexible SCs:** Based on Eq. S7 and S8, the volumetric energy density  $E$  (mWh cm<sup>-3</sup>) as well as power density  $P$  (mW cm<sup>-3</sup>) of the SC were calculated:

$$E = \frac{0.5 \times C_v \times (\Delta V)^2}{3.6} \quad (\text{Eq. S7})$$

$$P = \frac{E \times 3600}{\Delta t} \quad (\text{Eq. S8})$$

## Computational method

All calculations were implemented using the Vienna Abinitio Simulation Package (VASP) code based on Density Functional Theory (DFT).<sup>3,4</sup> For the following calculations of properties, General gradient approximation (GGA) was used with the Perdew–Burke–Ernzerhof (PBE) functional<sup>5</sup> to describe the exchange–correlation potential. All structural models were entirely relaxed until the ionic Hellmann–Feynman forces were smaller than 0.001 eV/Å, the energy tolerances were less than 10<sup>−6</sup> eV/atom. The interaction between core electrons and valence electrons were described using the frozen-core projector-augmented wave (PAW) method. Wave functions were expanded on a plane wave basis with high energy using plane-wave cutoff energy of 500 eV. The corresponding gamma-centered Monkhorst-Pack<sup>6</sup> electronic wavevector k-point samplings were denser than 0.2 Å<sup>−1</sup>. The surfaces were created by starting from a bulk-relaxed structure of VO<sub>2</sub> and MnO<sub>2</sub>. Specifically, the supercells of MnO<sub>2</sub> (001) were constructed by a 4×4 slab, while the supercell VO<sub>2</sub> (001) was modeled by a 3×2 slab with a vacuum layer of 15 Å. Correspondingly, the two Mo atoms and one F atom were doped into the lattices of MnO<sub>2</sub> (001) model. Note that a vacuum gap of 15 Å was added to prevent the interaction between slabs.

The adsorbed energy of adsorbed species marked as  $E_{ad}$  indicates the adsorbed capability of Na<sup>+</sup> ions. Adsorption formula can be defined as follows:

$$E_{ad} = E_{adsorbate/surface} - E_{adsorbate} - E_{surface}$$

Where  $E_{adsorbate/surface}$ ,  $E_{adsorbate}$ , and  $E_{surface}$  refer to the energy of adsorbate and surface, the energy of adsorbate, and the energy of surface.

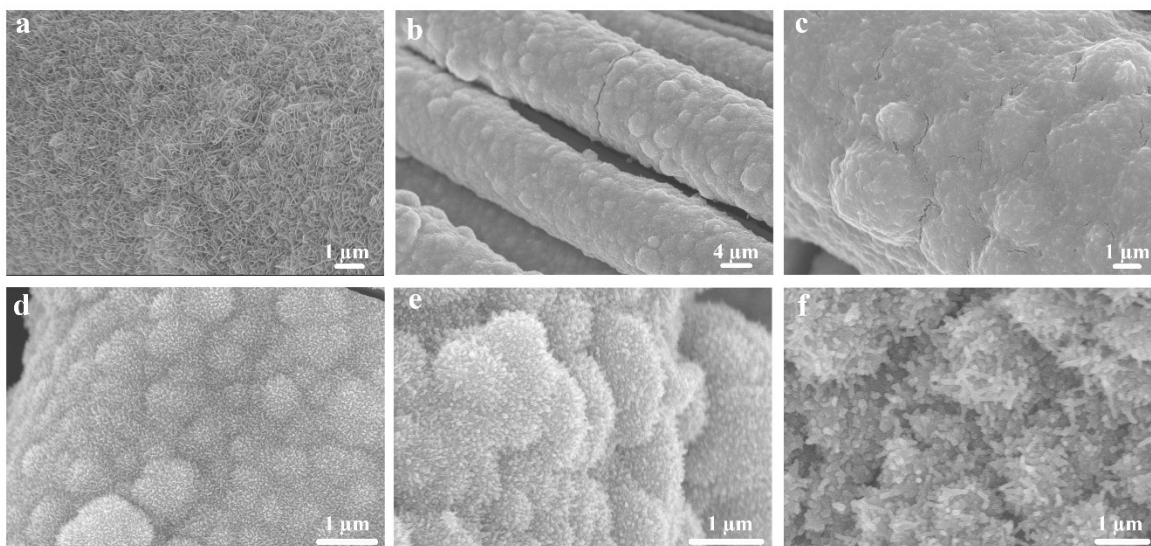

**Fig. S1** SEM images of (a) F-doped  $\text{MnO}_2$ , (b-c) MMO, (d) A-MMO, (e) A-MMO-4, and (f) A-MMO-6 samples.

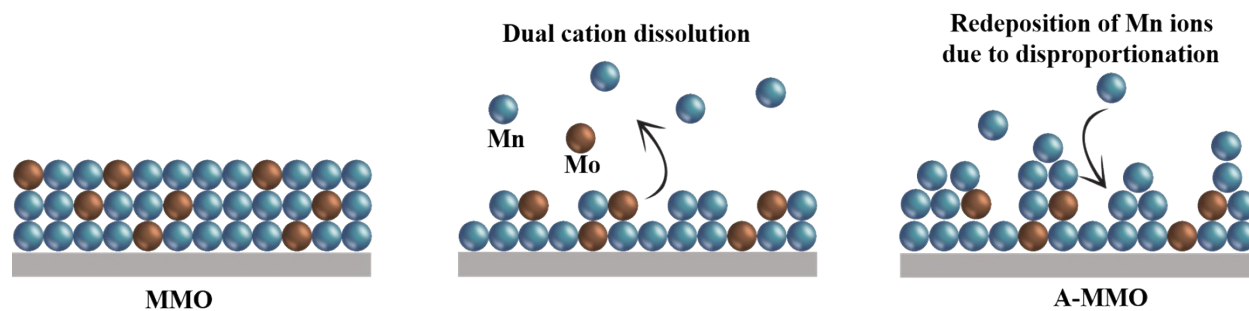

**Fig. S2** Illustration of the cation dissolution and re-deposition of A-MMO during AHA. Grey color: CF substrate.



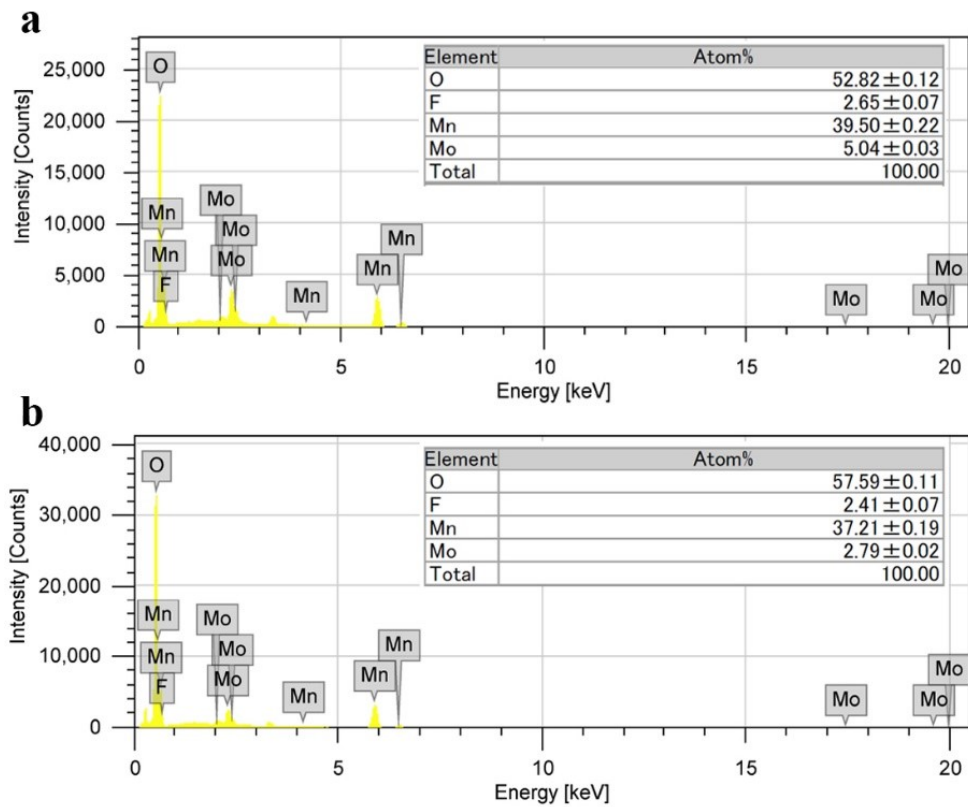

**Fig. S3** The atomic percentage of elements from EDS mapping results in (a) MMO and (b) A-MMO.

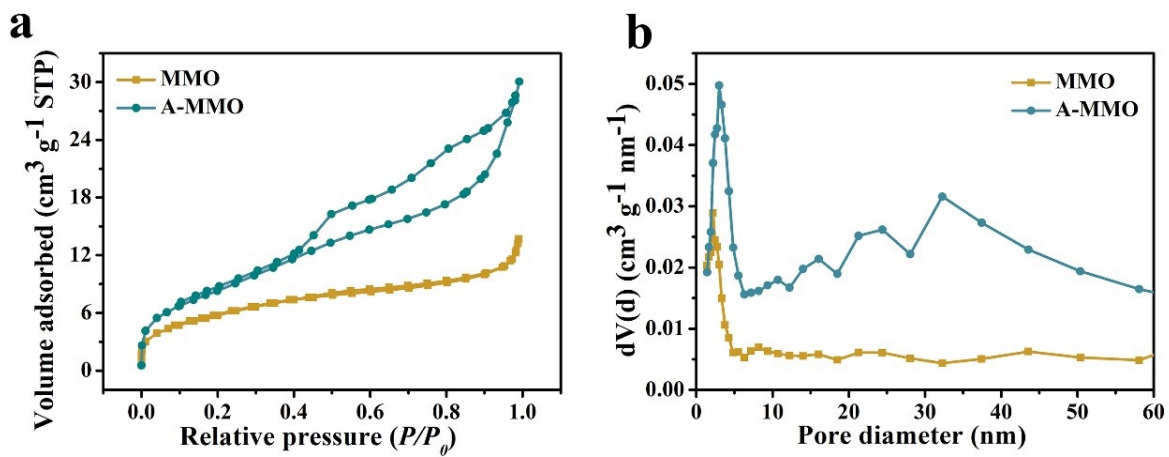

**Fig. S4** (a) BET nitrogen adsorption-desorption isotherm curves and (b) Barrett-Joyner-Halenda (BJH) pore size distribution curves of MMO and A-MMO samples.

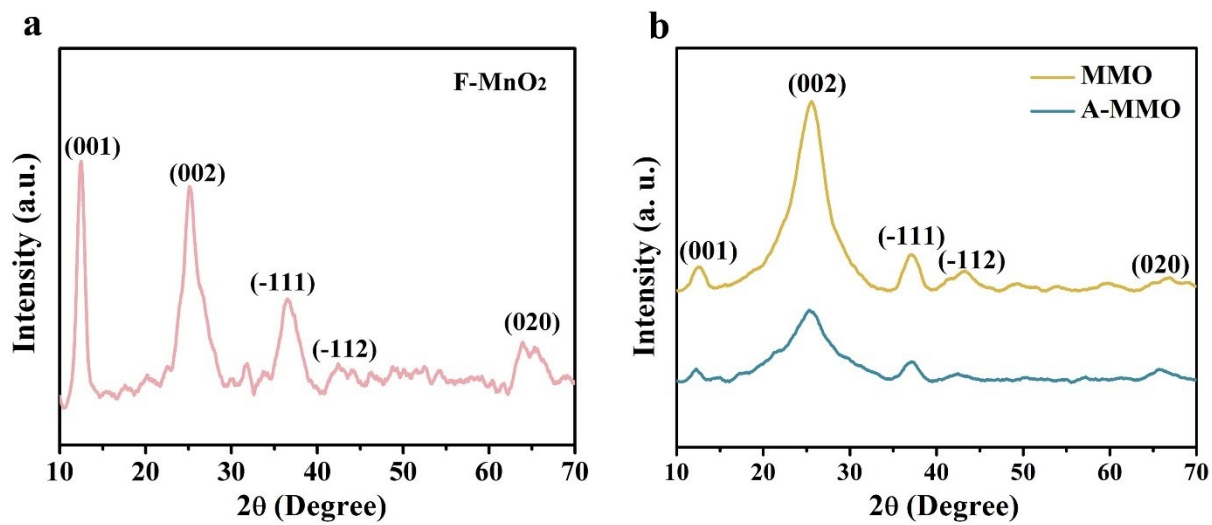

**Fig. S5** XRD patterns of (a) F-doped MnO<sub>2</sub>, and (b) MMO and A-MMO.

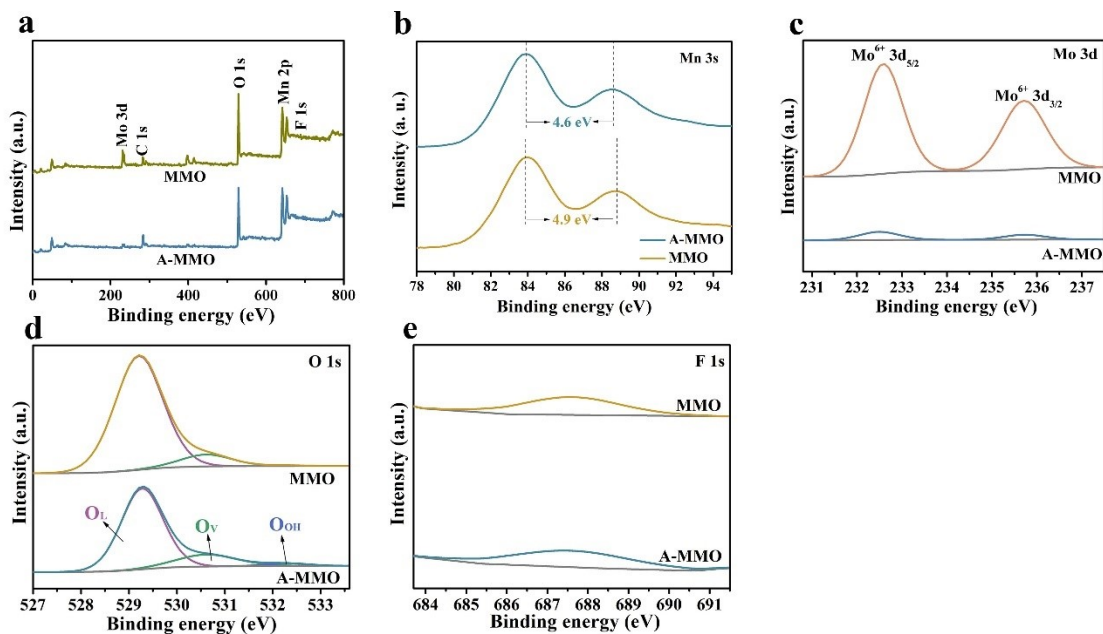

**Fig. S6** (a) XPS survey spectrum, XPS spectra of (b) Mn 3s, (c) Mo 3d, (d) O 1s, and (e) F 1s of A-MMO and MMO samples.

**Note to Fig. S6** The O 1s spectra of samples are split into three peaks at 529.3, 530.6, and 532.3 eV, corresponding to lattice oxygen ( $O_L$ ), oxygen species with low coordination adsorbed on oxygen vacancies ( $O_V$ ), and adsorbed water species ( $O_{OH}$ ).<sup>7</sup>

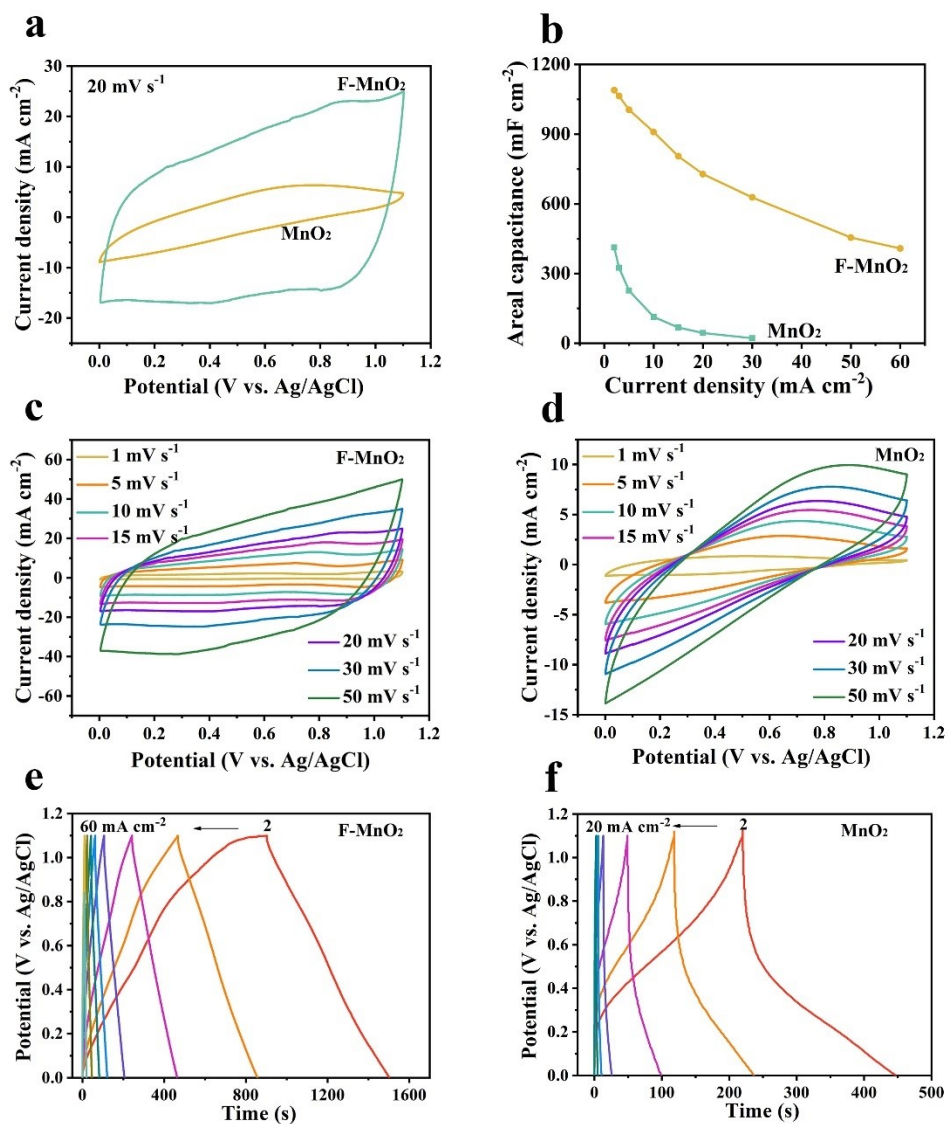

**Fig. S7** (a) Comparison of CV curves of MnO<sub>2</sub> and F-MnO<sub>2</sub> at 20 mV s<sup>-1</sup>. (b) Areal capacitances at different current densities of MnO<sub>2</sub> and F-MnO<sub>2</sub>. CV curves of (c) MnO<sub>2</sub> and (d) F-MnO<sub>2</sub> at different scan rates from 1 to 50 mV s<sup>-1</sup>. GCD curves of (e) MnO<sub>2</sub> and (f) F-MnO<sub>2</sub> at different current densities.

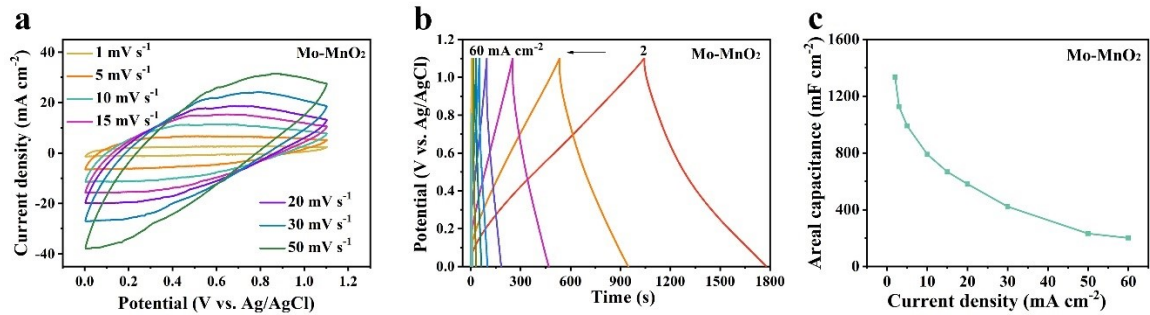

**Fig. S8** (a) CV curves at different scan rates from 1 to 50 mV s<sup>-1</sup>, (b) GCD curves of Mo-MnO<sub>2</sub>.

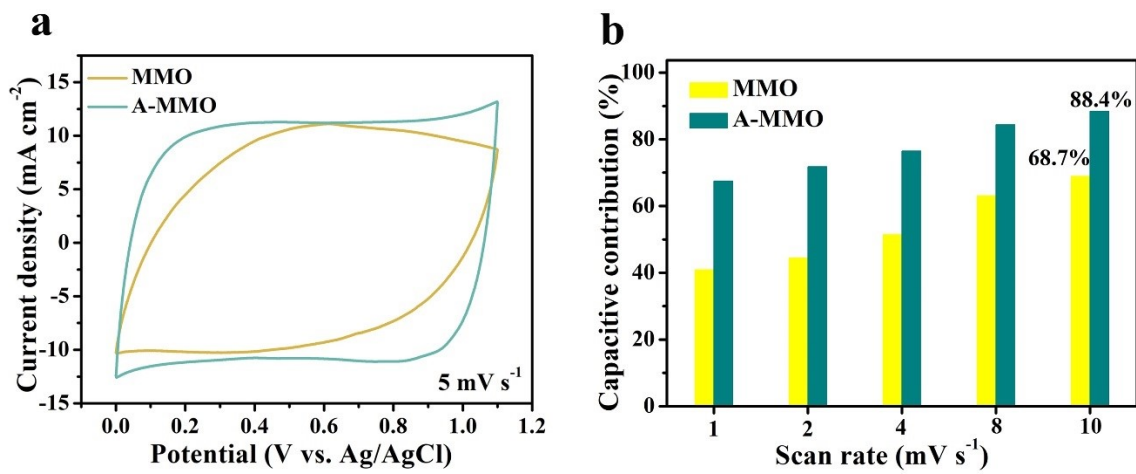

**Figure S9** (a) CV curves at 5 mV s<sup>-1</sup>. (b) The percentage of capacitive contribution at various scan rates

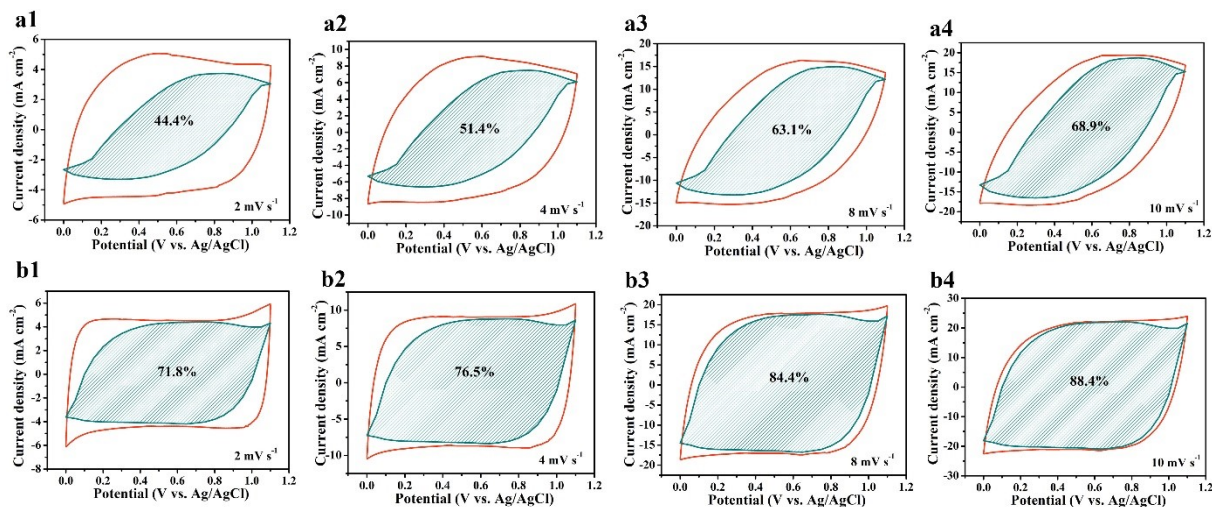

**Fig. S10** Comparison of capacitive contribution (shaded area) in CV curves at 2, 4, 8, and 10  $\text{mV s}^{-1}$  of (a1-a4) MMO, and (b1-b4) of A-MMO.

**Note to Fig. S10** According to the Dunn's method,<sup>8</sup> charges stored in electrode materials can be divided to surface capacitive-controlled as well as diffusion-controlled processes. Based on Eq. S9 and S10, the relationship between the current density and scan rate in a CV profile at a specific potential is described as:

$$i(v) = k_1 v + k_2 v^{1/2} \quad (\text{Eq. S9})$$

or

$$i(v)/v^{1/2} = k_1 v^{1/2} + k_2 \quad (\text{Eq. S10})$$

where  $k_1$  and  $k_2$  refer to constants.  $i$  and  $v$  represent the current density and scan rate, respectively.  $k_1$  and  $k_2$  values can be derived from the slope and y-intercept at a given voltage a plot of  $i/v^{1/2}$  vs.  $v^{1/2}$ , respectively. The capacitive- and diffusion-controlled processes are denoted as  $k_1 v$  and  $k_2 v^{1/2}$ , respectively.



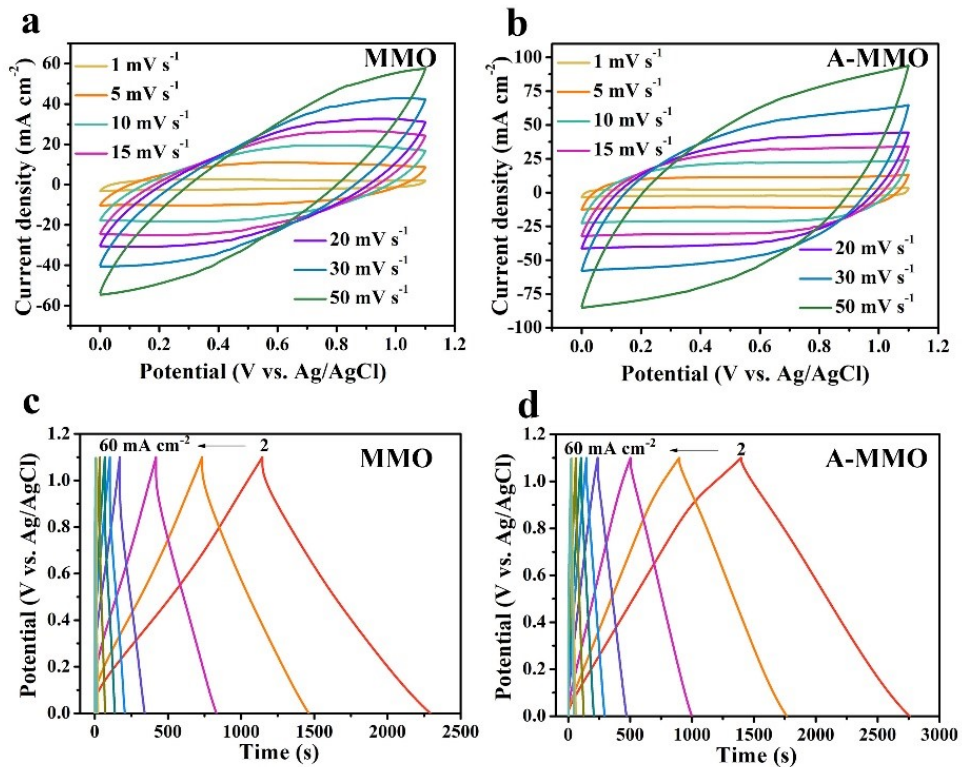

**Fig. S11** CV curves of (a) MMO and (b) A-MMO at different scan rates from 1 to 50 mV s<sup>-1</sup>.

GCD curves of (c) MMO and (d) A-MMO at different current densities from 2 to 60 mA cm<sup>-2</sup>.

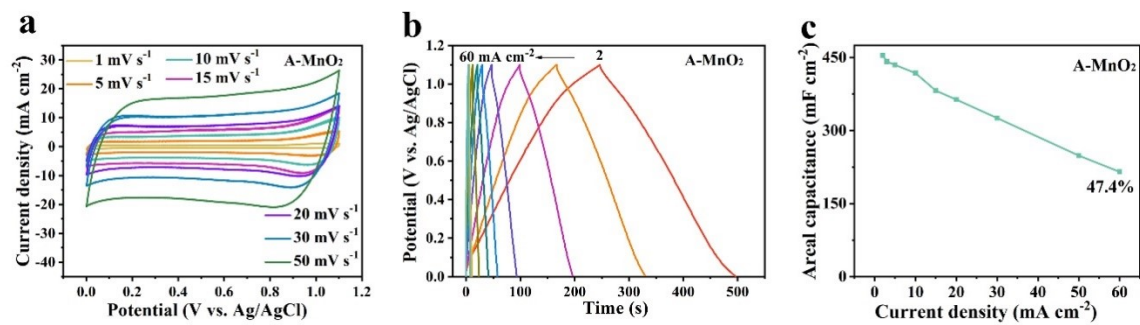

**Fig. S12** (a) CV curves at different scan rates from 1 to 50 mV s<sup>-1</sup>, (b) GCD curves of A-MnO<sub>2</sub>.

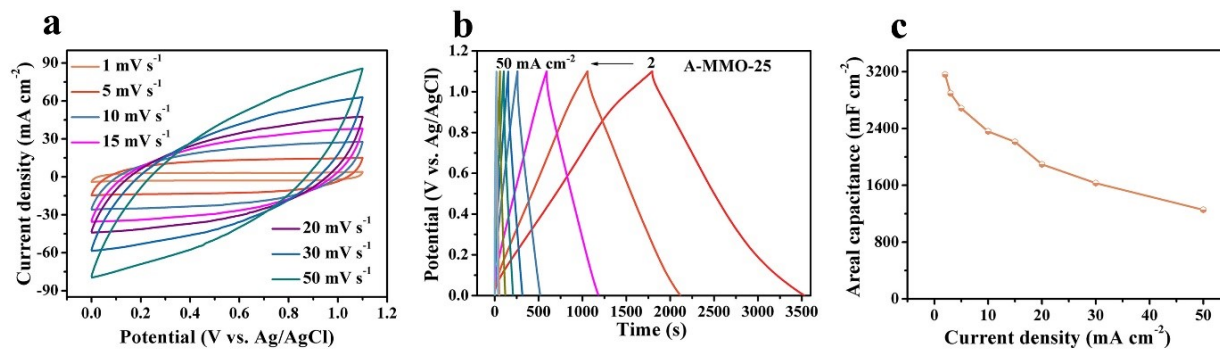

**Fig. S13** (a) CV curves at different scan rates from 1 to 50 mV s<sup>-1</sup>, (b) GCD curves at different current densities from 2 to 50 mA cm<sup>-2</sup>, and (c) Areal capacitances at different current densities of A-MMO-25.

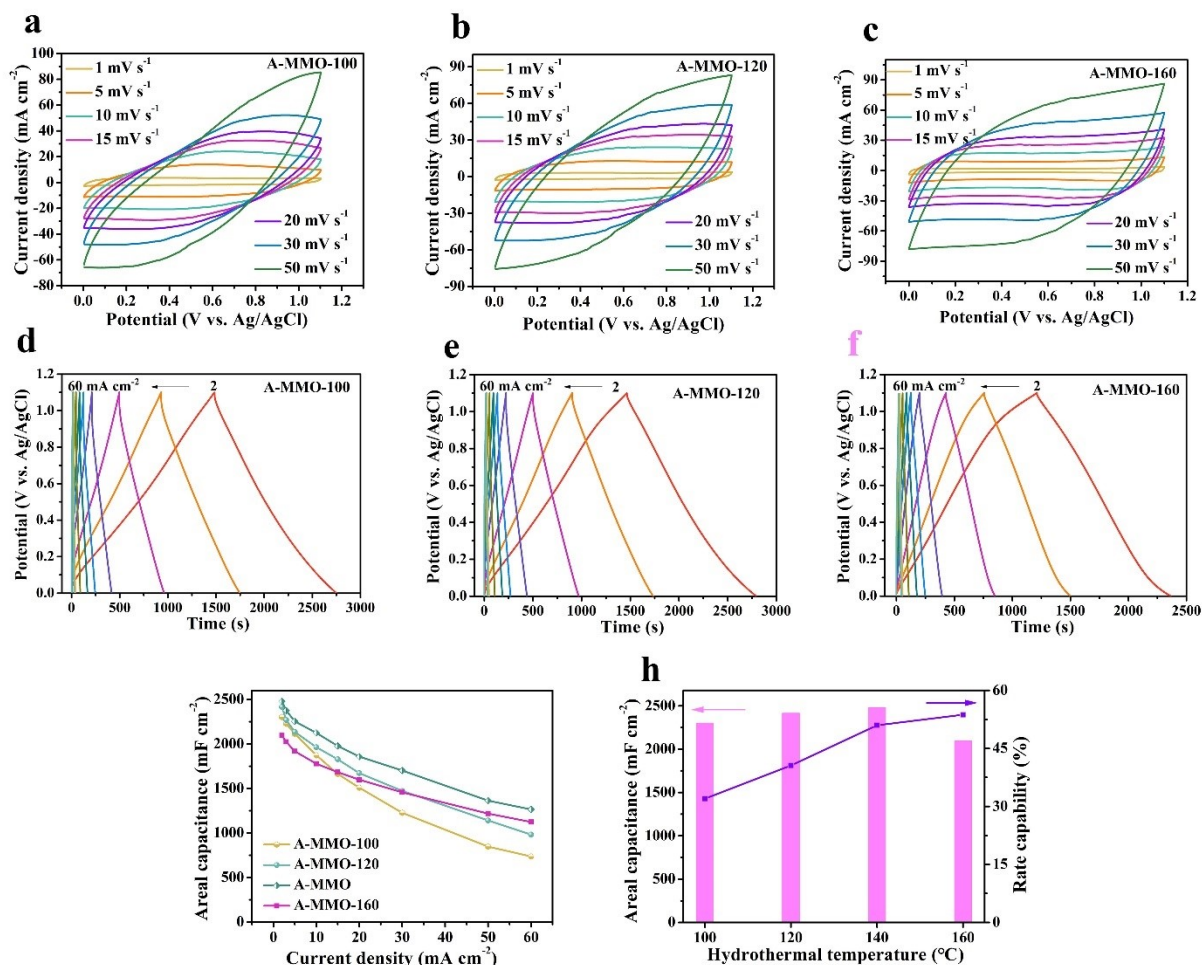

**Fig. S14** CV curves of (a) A-MMO-100, (b) A-MMO-120, and (c) A-MMO-160 at different scan rates from 1 to 50 mV s<sup>-1</sup>. GCD curves of (d) A-MMO-100, (e) A-MMO-120, and (f) A-MMO-160 at different current densities from 2 to 60 mA cm<sup>-2</sup>. (g) Their areal capacitances at different current densities. (h) Comparison of areal capacitance of electrodes at 2 mA cm<sup>-2</sup> and their rate capability at 60 mA cm<sup>-2</sup>.

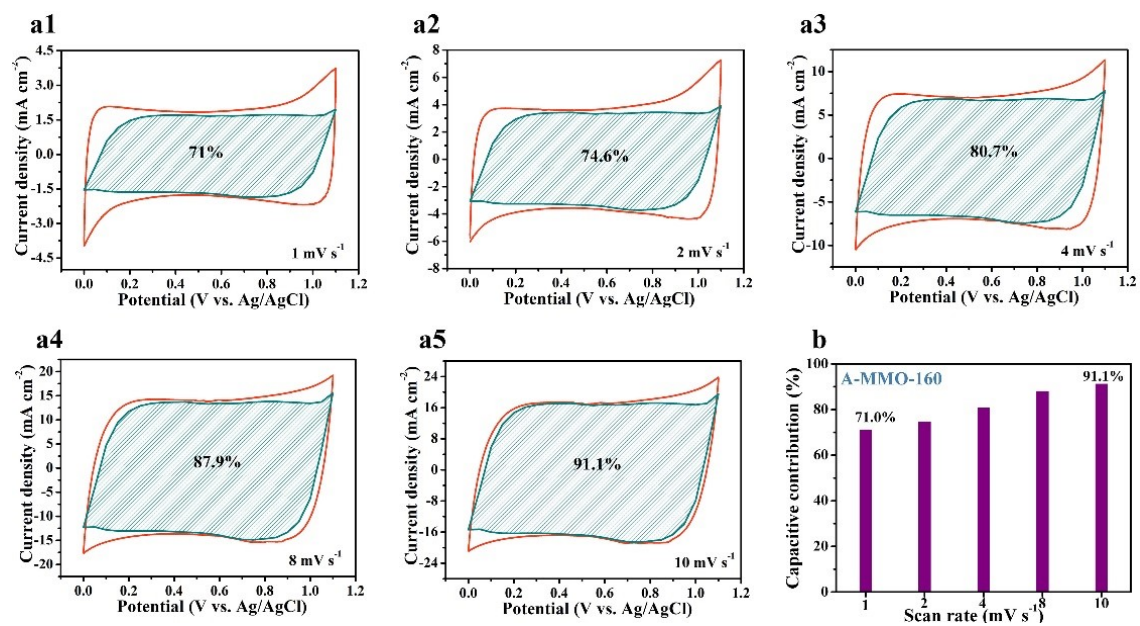

**Fig. S15** (a1-a5) Comparison of capacitive contribution (shaded area) in CV curves of A-MMO-160 at 1, 2, 4, 8, and 10 mV s<sup>-1</sup>. (b) Their percentage of capacitive contribution at various scan rates.

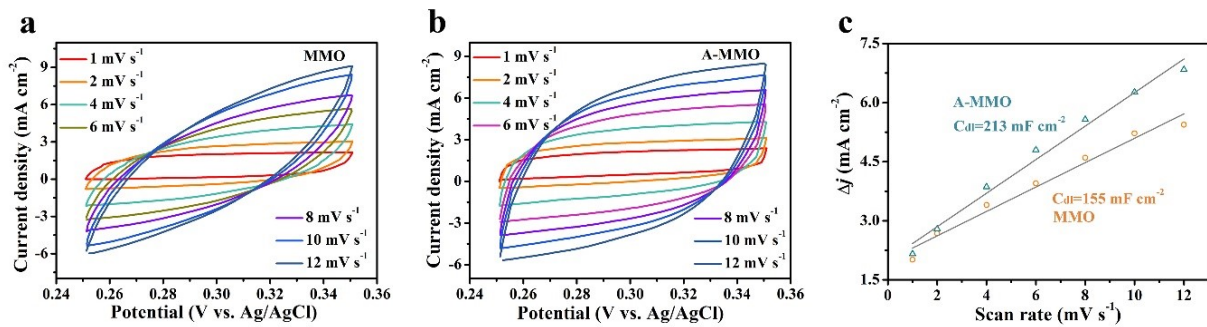

**Fig. S16** CV curves of (a) MMO and (b) A-MMO in a potential window from 0.25 V to 0.35 V at different scan rates from 1 to 12 mV s<sup>-1</sup>. (c) Charging current density differences  $\Delta j$  at 0.3 V as a function of different scan rates.

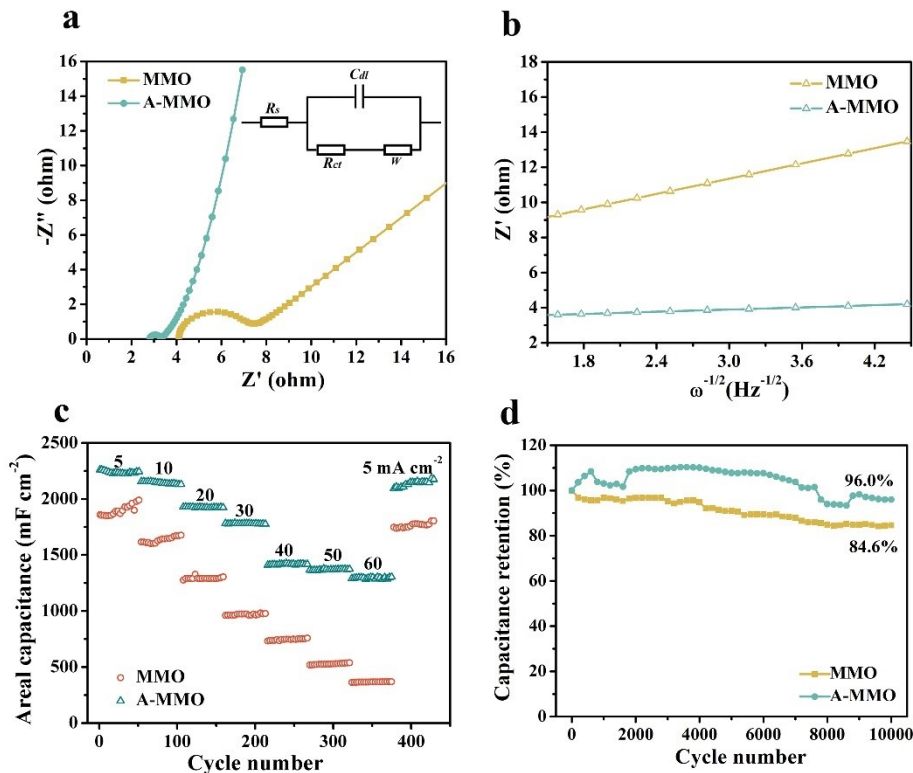

**Fig. S17** (a) Nyquist plots (inset: a fitted equivalent circuit). (b) Relationship between  $Z'$  and  $\omega^{-1/2}$ . (c) Cycling stability at different current densities. (d) Long-term cycling test.

**Note to Fig. S17** Electrochemical impedance spectroscopy (EIS) measurements of the MMO and A-MMO electrodes were used to study their electrochemical process. Warburg factors can be represented by the slope of the impedance ( $Z'$ ) vs.  $\omega^{-1/2}$  plot in the Warburg region, and they are inversely proportional to the ion diffusion coefficient.<sup>9</sup> Fig. S14c shows the cycling stability of the two samples at different current densities from 5 to 60 mA cm<sup>-2</sup>. MMO and A-MMO deliver average capacitances of 1898 and 2239 mF cm<sup>-2</sup> at 5 mA cm<sup>-2</sup>, respectively. When the current density was set back to 5 mA cm<sup>-2</sup> after cycling at various current densities, 93.0% of the original capacitance in MMO was recovered, and 95.5% of that of A-MMO. Even after 10000 continuous cycles at 60 mA cm<sup>-2</sup> (Fig. S14d), A-MMO retains 96.0% of the original capacitance and preserves an integrated structure, while 84.6% of the original capacitance of MMO is maintained.

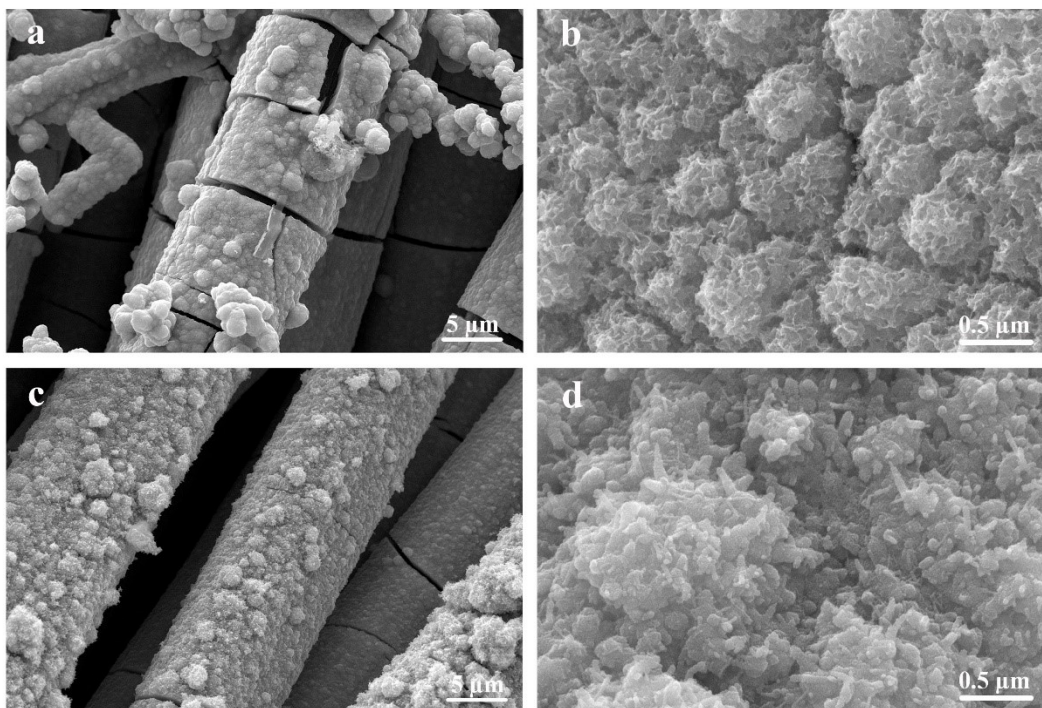

**Fig. S18** SEM images of a, b) MMO and c, d) A-MMO after cycling.

**Note to Fig. S17d and S18** The A-MMO sample shows an increased capacitance during the initial 800 cycles due to the gradual activation of bulk structure. The porous surface layer can perform as facile channels for ion penetration into the bulk material, which activates more active sites accessible for electrolyte ions during the initial cycling. However, MMO shows a smooth bulk structure where electrolyte ions hardly penetrate inside the material, which degrades its performance along cycling. As a result, MMO shows cracked structure with a porous nanosheet morphology, which is attributed to the repeated  $\text{Na}^+$  insertion/extraction during the continuous charge/discharge process. A-MMO still demonstrates a rough surface with intact structure. As demonstrated by the *ex situ* XRD result, the cell volume of  $[\text{MnO}_6]$  could be recovered after one charge/discharge process. CVAs can accommodate the volumetric change and thus mitigate the



structural strain during  $\text{Na}^+$  insertion/extraction, ensuring highly reversible redox reactions and good cycling stability.

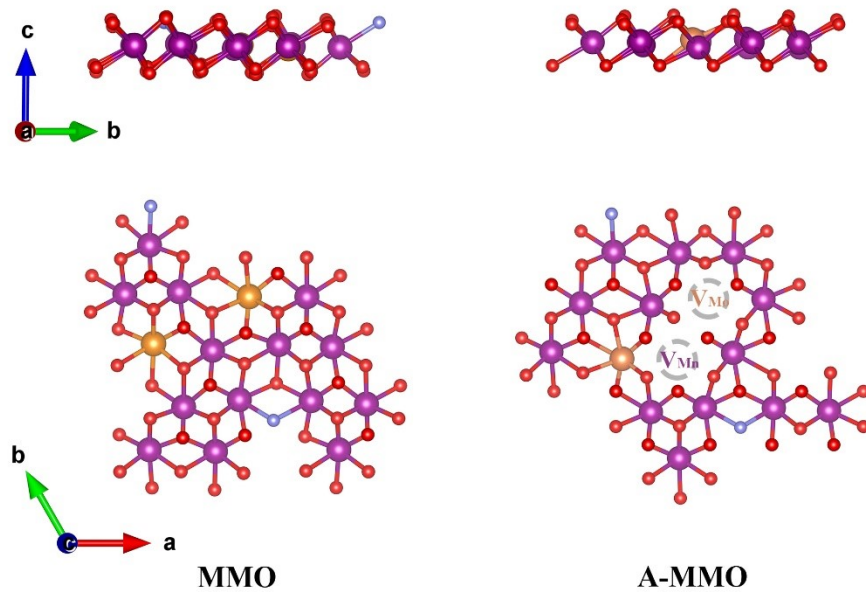

**Fig. S19** Molecular structures of MMO and A-MMO.

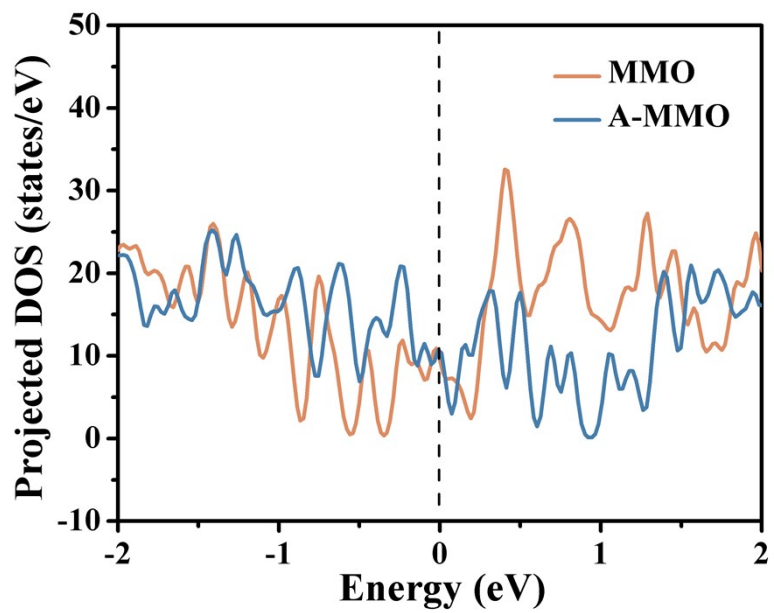

**Fig. S20** PDOS of MMO and A-MMO.

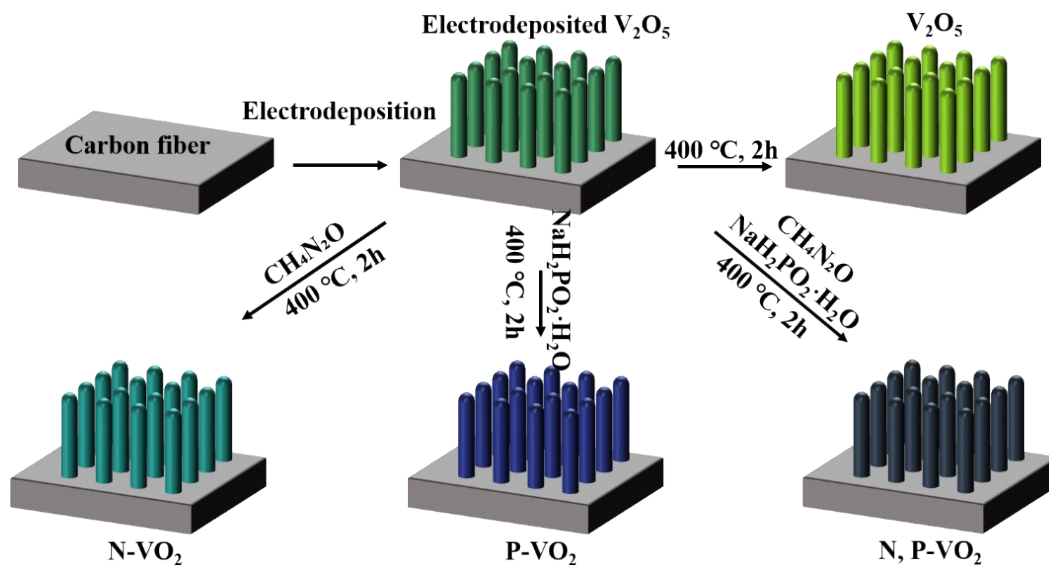

**Fig. S21** Illustration of the process of preparing  $V_2O_5$ , N- $VO_x$ , P- $VO_x$ , N, P- $VO_x$ .

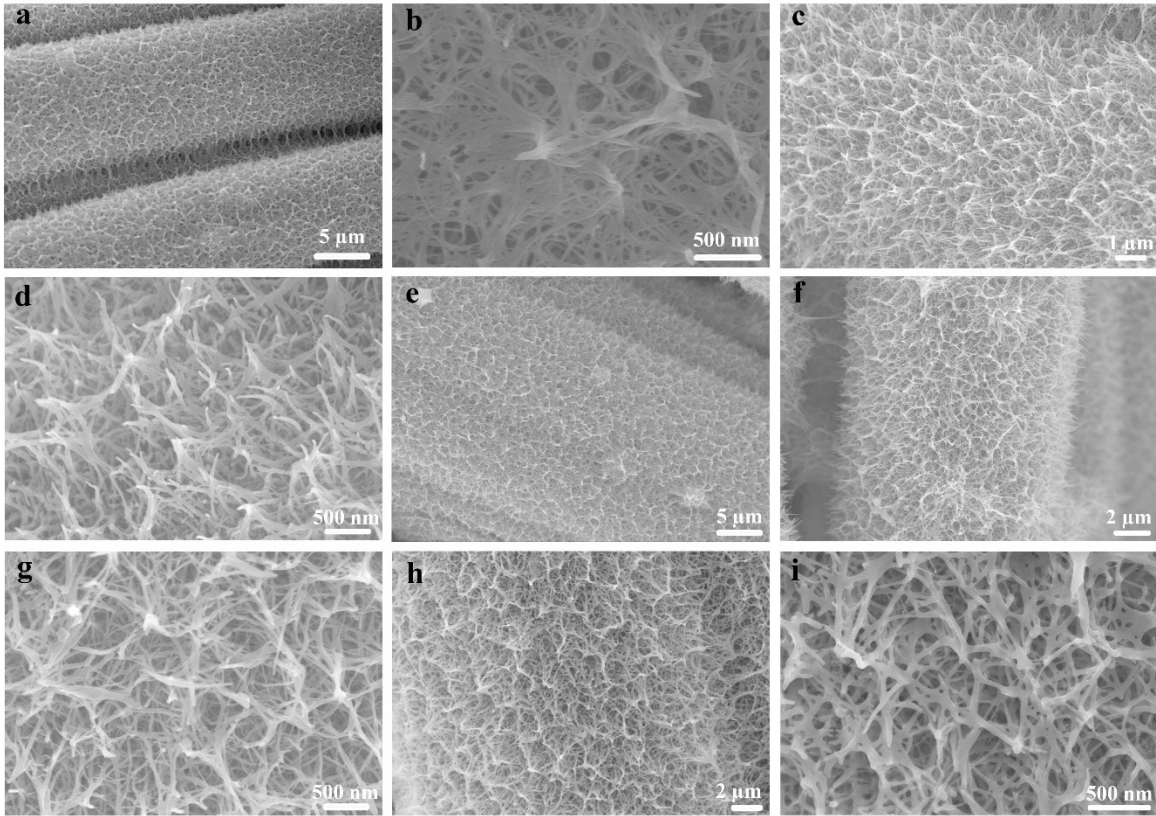

**Fig. S22** SEM images of samples. (a, b) electrodeposited  $V_2O_5$  on CFs. (c, d)  $V_2O_5$ . (e) N, P- $VO_x$ . (f, g) N- $VO_x$ . (h, i) P- $VO_x$ .

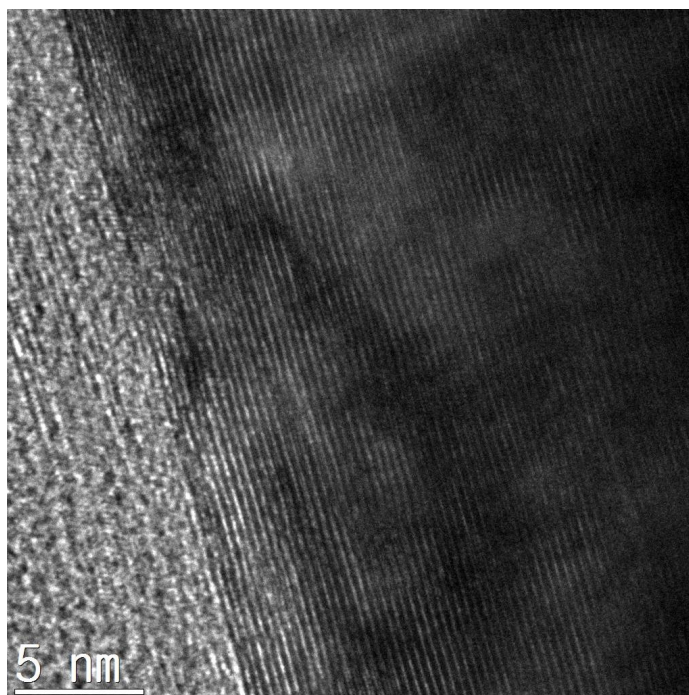

**Fig. S23** HR-TEM image of V<sub>2</sub>O<sub>5</sub>.

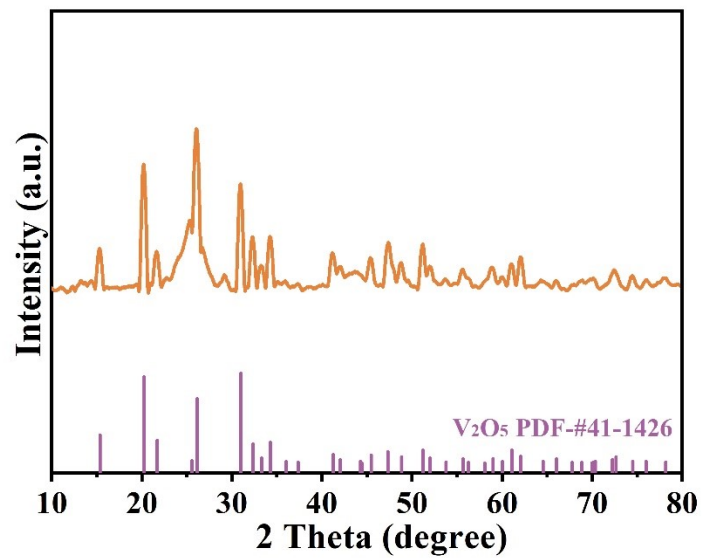

Fig. S24 XRD pattern of  $V_2O_5$ .

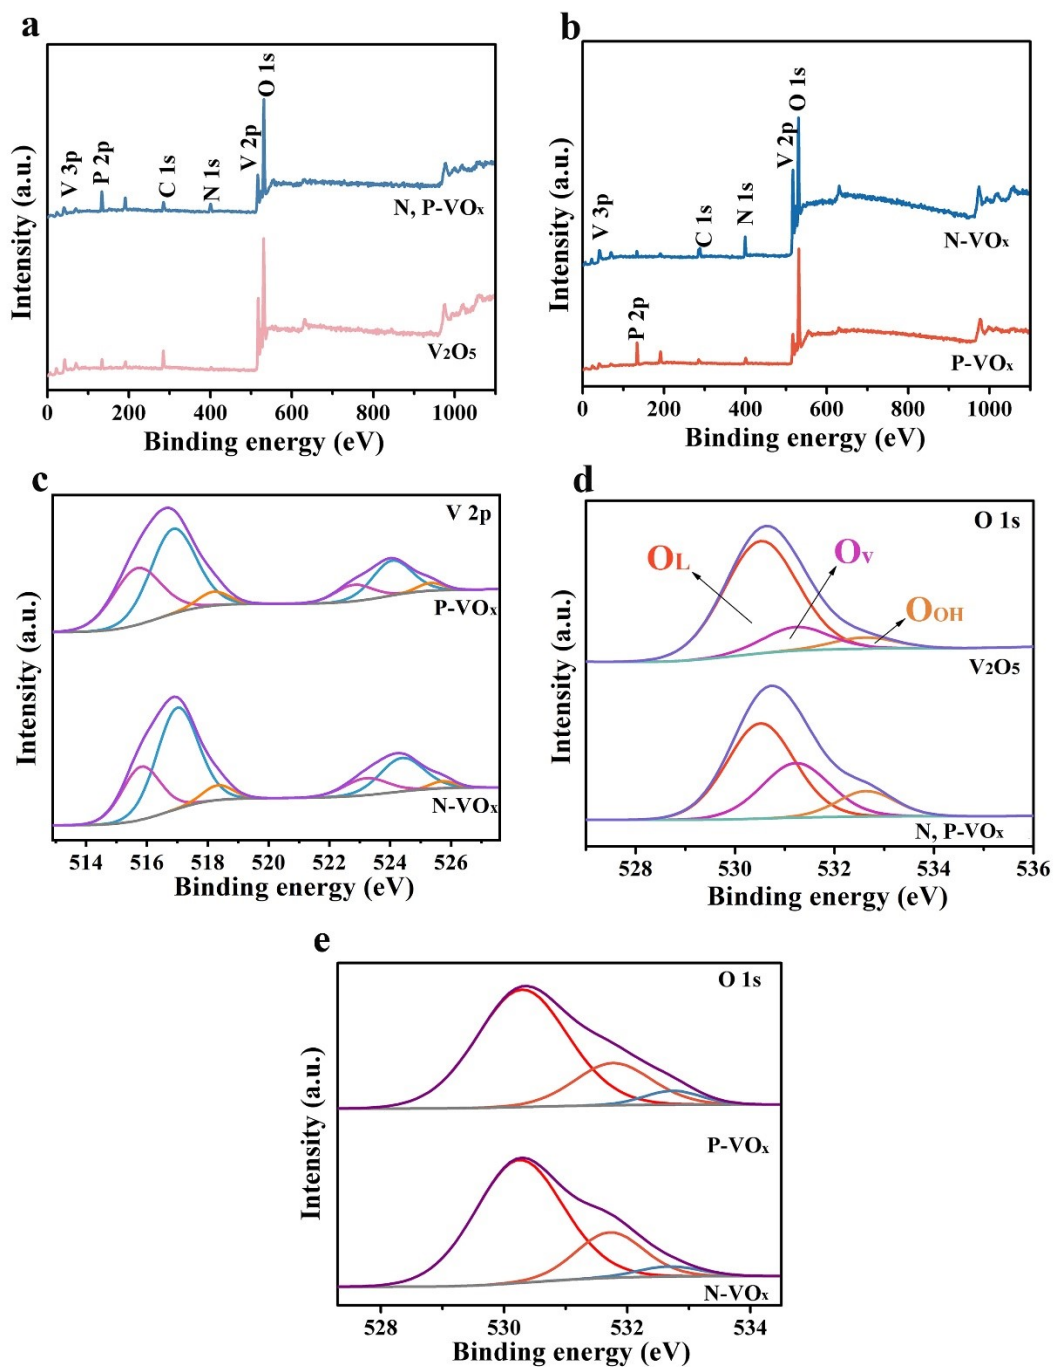

**Fig. S25** XPS survey spectra of (a)  $V_2O_5$  and N, P- $VO_x$ , and (b) N- $VO_x$  and P- $VO_x$ . (c) XPS V 2p spectra of N- $VO_x$ , and P- $VO_x$ . XPS O 1s spectra of (d)  $V_2O_5$ , N, P- $VO_x$ . (e) N- $VO_x$  and P- $VO_x$ .

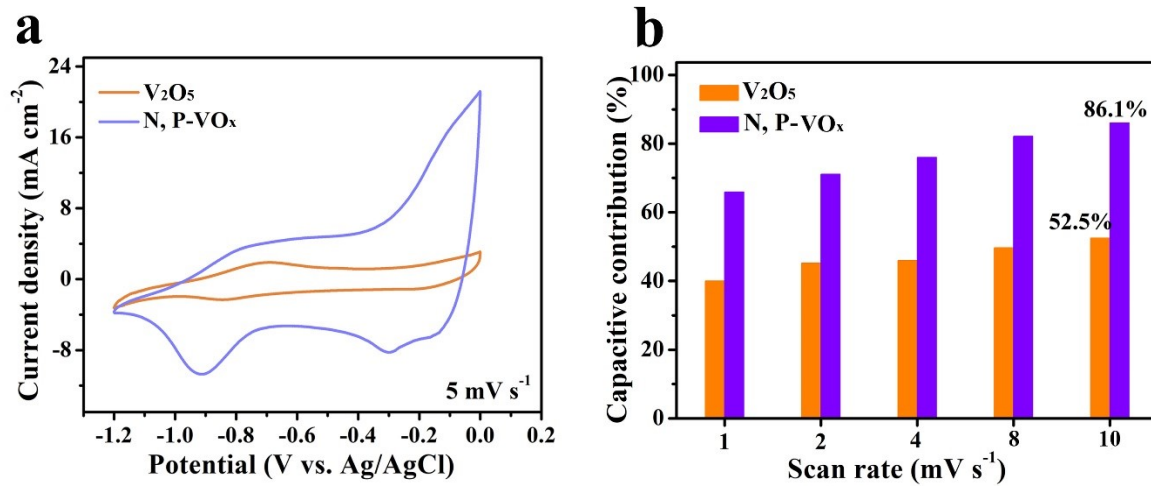

**Figure S26** (a) CV curves at  $5 \text{ mV s}^{-1}$ , and (b) the percentage of capacitive contribution at various scan rates of  $\text{V}_2\text{O}_5$  and N, P- $\text{VO}_x$ .



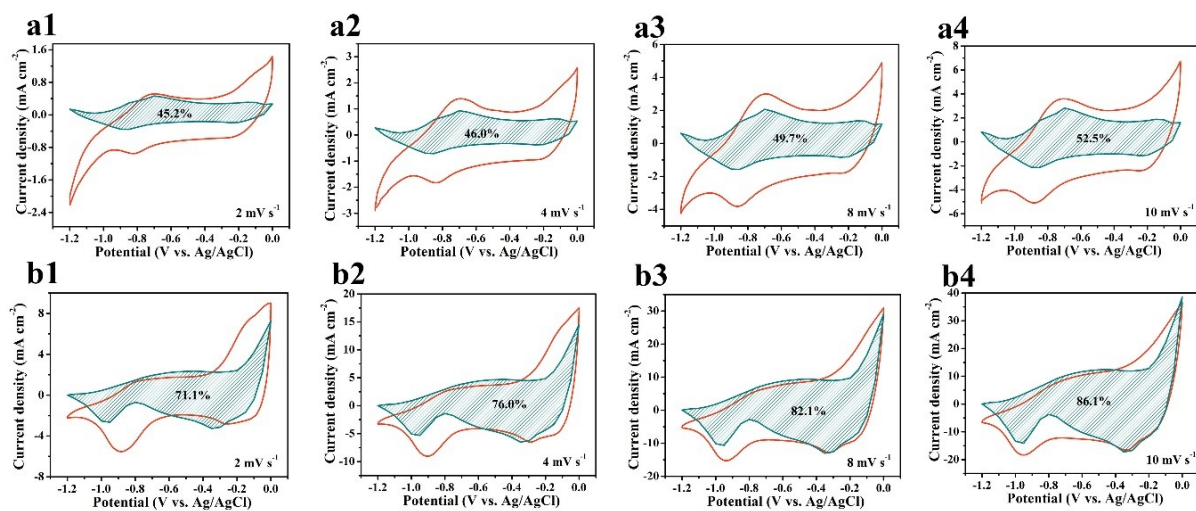

**Fig. S27** Comparison of capacitive contribution (green shaded area) in CV curves at 2, 4, 8, and 10  $mV s^{-1}$ . (a1-a4) of  $V_2O_5$ . (b1-b4) N, P- $VO_x$ .

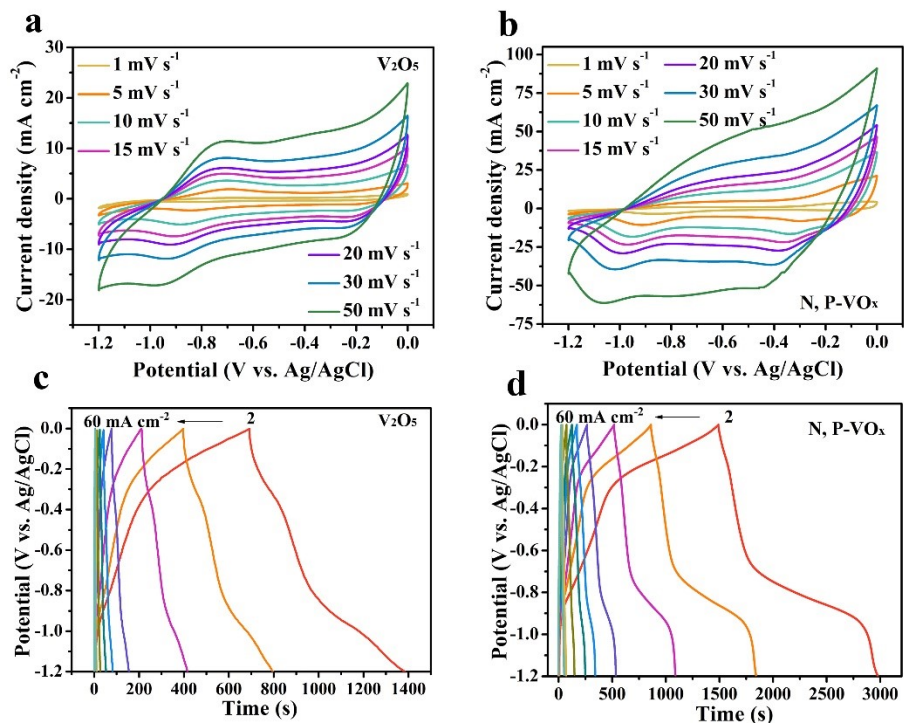

**Fig. S28** CV curves of (a)  $V_2O_5$  and (b) N, P- $VO_x$  at different scan rates from 1 to 50  $mV s^{-1}$ . GCD curves of (c)  $V_2O_5$  and (d) N, P- $VO_x$  at different current densities from 2 to 60  $mA cm^{-2}$ .

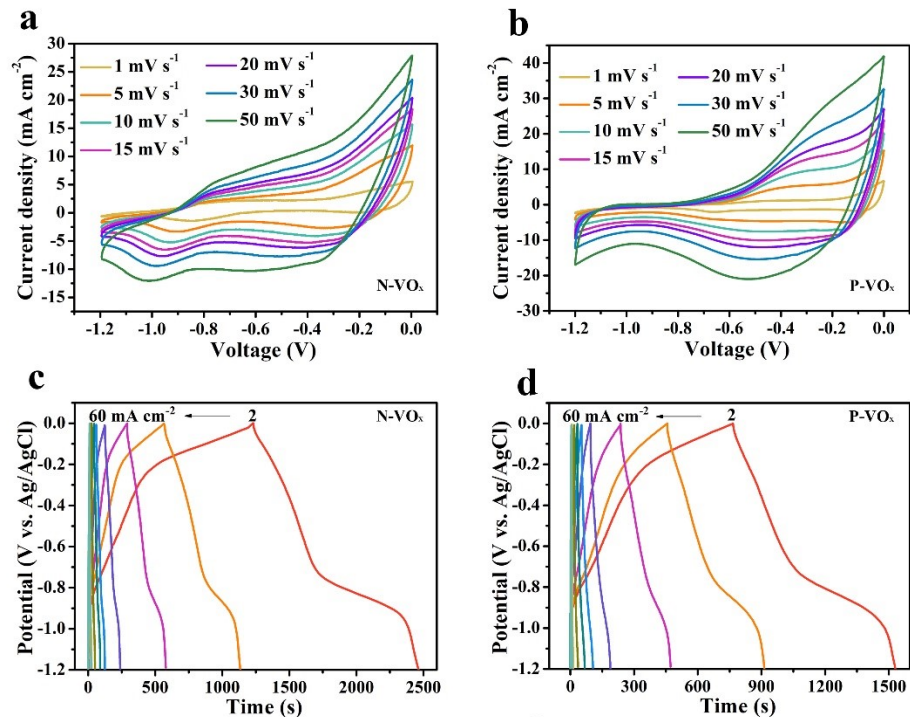

**Fig. S29** CV curves of (a) N-VO<sub>x</sub> and (b) P-VO<sub>x</sub> at different scan rates from 1 to 50 mV s<sup>-1</sup>. GCD curves of (c) N-VO<sub>x</sub> and (d) P-VO<sub>x</sub> at different current densities from 2 to 60 mA cm<sup>-2</sup>.

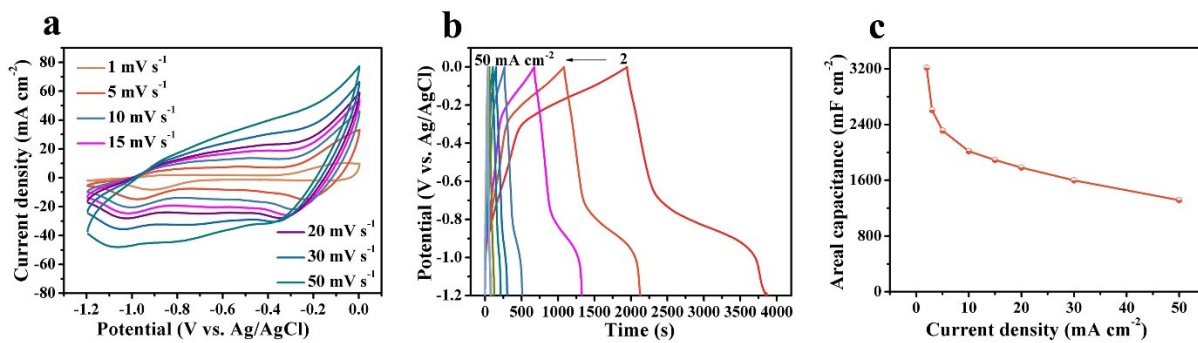

**Fig. S30** (a) CV curves of N, P-VO<sub>x</sub>-60 at different scan rates from 1 to 50  $\text{mV s}^{-1}$ , (b) GCD curves at different current densities from 2 to 50  $\text{mA cm}^{-2}$ , and (c) Their areal capacitances at different current densities.

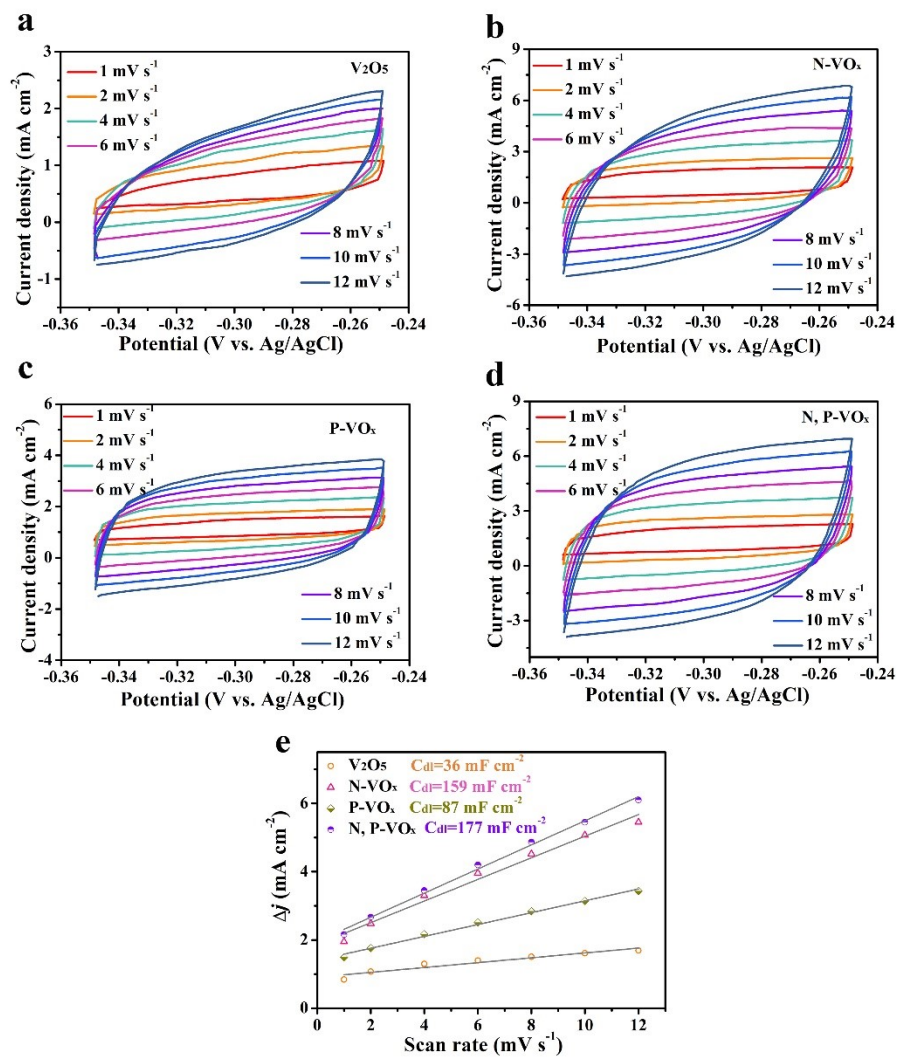

**Fig. S31** CV curves of (a) V<sub>2</sub>O<sub>5</sub>, (b) N-VO<sub>x</sub>, (c) P-VO<sub>x</sub>, and (d) N, P-VO<sub>x</sub> in a potential window from -0.35 V to -0.25 V at different scan rates from 1 to 12 mV s<sup>-1</sup>. (e) Δj at -0.3 V as a function of different scan rates.

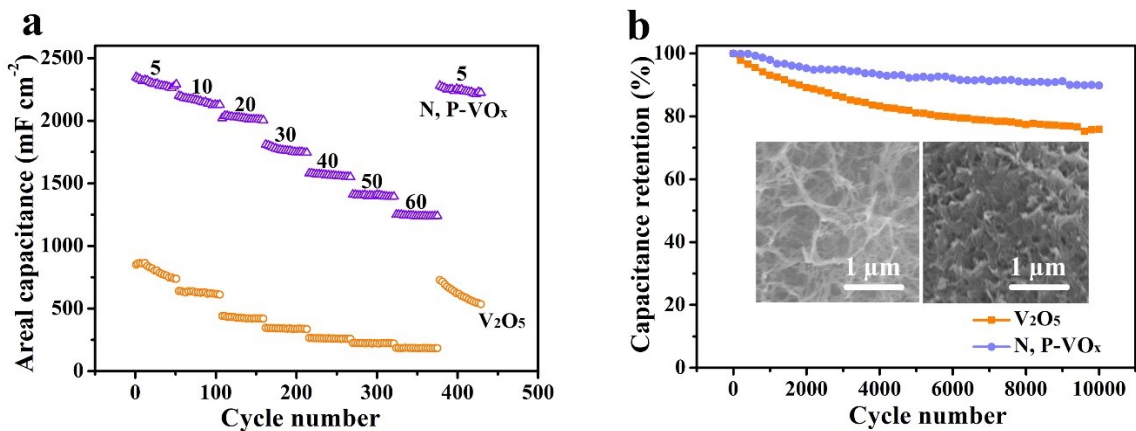

**Fig. S32** (a) Cycling stability at different current densities. (b) Long-term cycling test and SEM images of N, P-VO<sub>x</sub> and V<sub>2</sub>O<sub>5</sub> after cycling, respectively (insets).

**Note to Fig. S32** Fig. S28a shows V<sub>2</sub>O<sub>5</sub> and N, P-VO<sub>x</sub> deliver average capacitances of 803 and 2291 mF cm<sup>-2</sup> at 5 mA cm<sup>-2</sup>, respectively, and N, P-VO<sub>x</sub> demonstrates better cycling stability than V<sub>2</sub>O<sub>5</sub> at different current densities. When the current density was set back to 5 mA cm<sup>-2</sup> after cycling at various current densities, 76.7% and 97.5% of the original capacitance were recovered, respectively. Moreover, N, P-VO<sub>x</sub> and V<sub>2</sub>O<sub>5</sub> maintain 89.5% and 75.9% of the initial capacitance after 10000 cycles at 60 mA cm<sup>-2</sup> (Fig. S28b).

**a**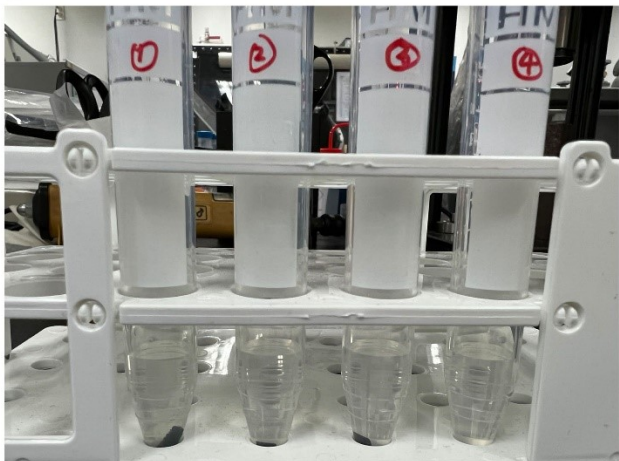**b**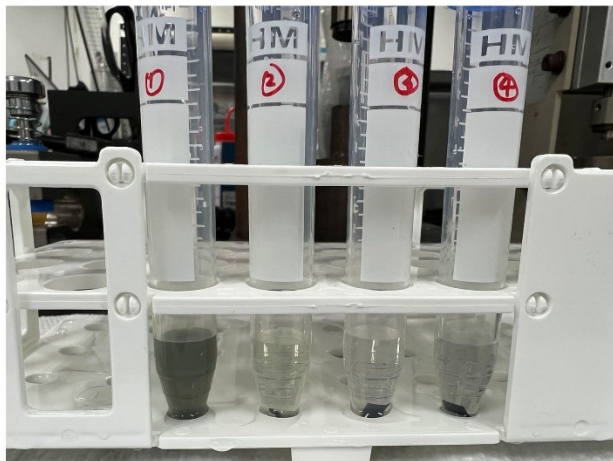

**Fig. S33** Digital photographs of samples (a) before sonication, and (b) after sonication for 15 mins. Sample 1, 2, 3, and 4 marked in the photographs stand for  $V_2O_5$ , N- $VO_x$ , P- $VO_x$ , and N, P- $VO_x$ , respectively.

**Note to Fig. S33** Each sample with the same area was immersed in DI water.  $V_2O_5$  shows serious dissolution after sonication compared with other samples.

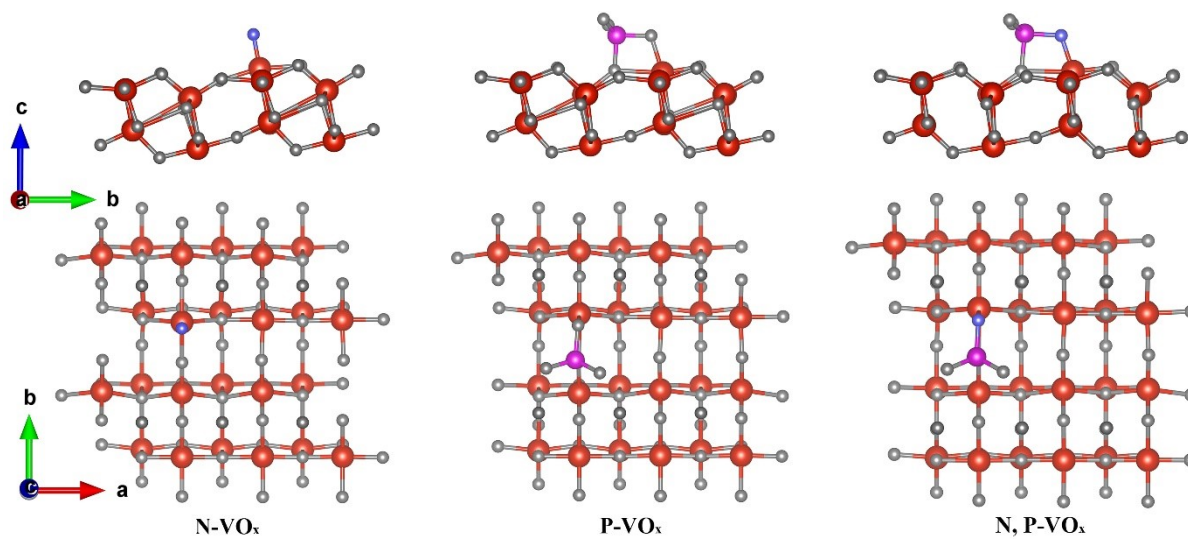

**Fig. S34** Molecular structures of N-VO<sub>x</sub>, P-VO<sub>x</sub>, and N, P-VO<sub>x</sub>.



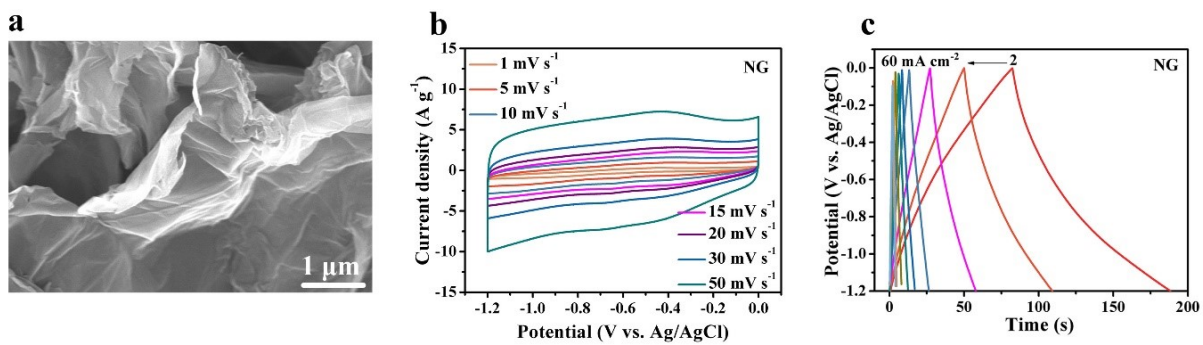

**Fig. S35** (a) The SEM image, (b) CV curves of NG at different scan rates, and (c) GCD curves of NG at different current densities.

**Note to Fig. S35** NG can deliver a specific capacitance of  $177 \text{ F g}^{-1}$  at  $2 \text{ A g}^{-1}$  and remain 45.2% of initial capacitance at  $60 \text{ A g}^{-1}$ .

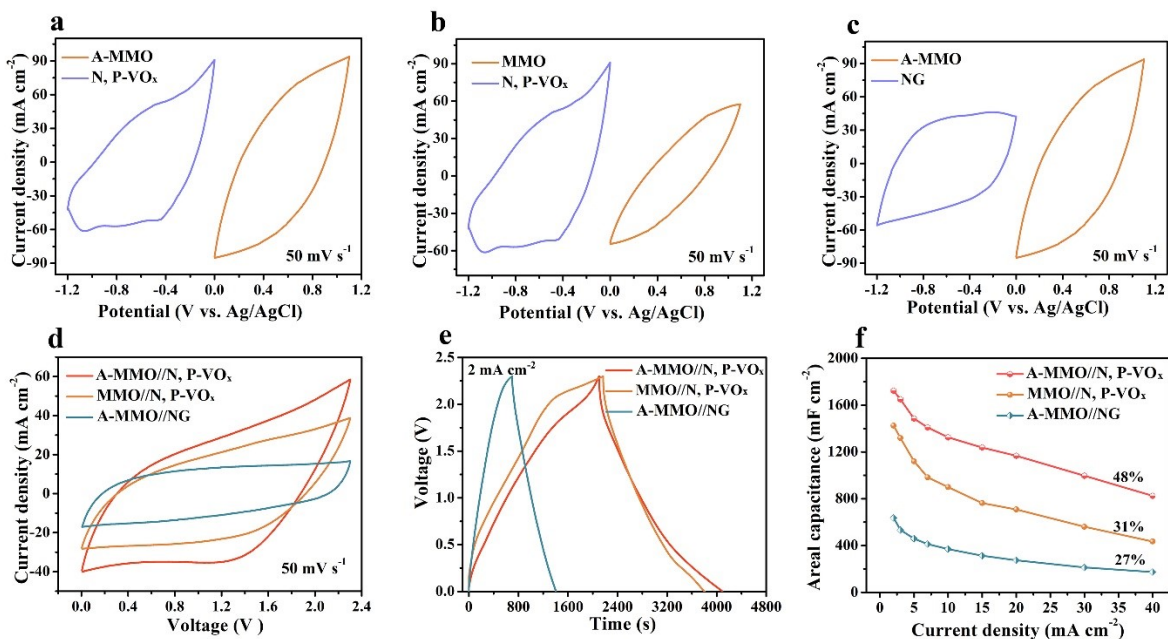

**Fig. S36** Electrochemical performance of flexible quasi-solid-state A-MMO//N, P-VO<sub>x</sub>, MMO//N, P-VO<sub>x</sub>, A-MMO//NG SCs. (a-c) CV curve comparison at 5 mV s<sup>-1</sup> of positive and negative electrodes of corresponding SCs. (d) CV curves at 5 mV s<sup>-1</sup>. (e) GCD curves at 2 mA cm<sup>-2</sup>. (f) Areal capacitances at different current densities from 2 to 40 mA cm<sup>-2</sup>.

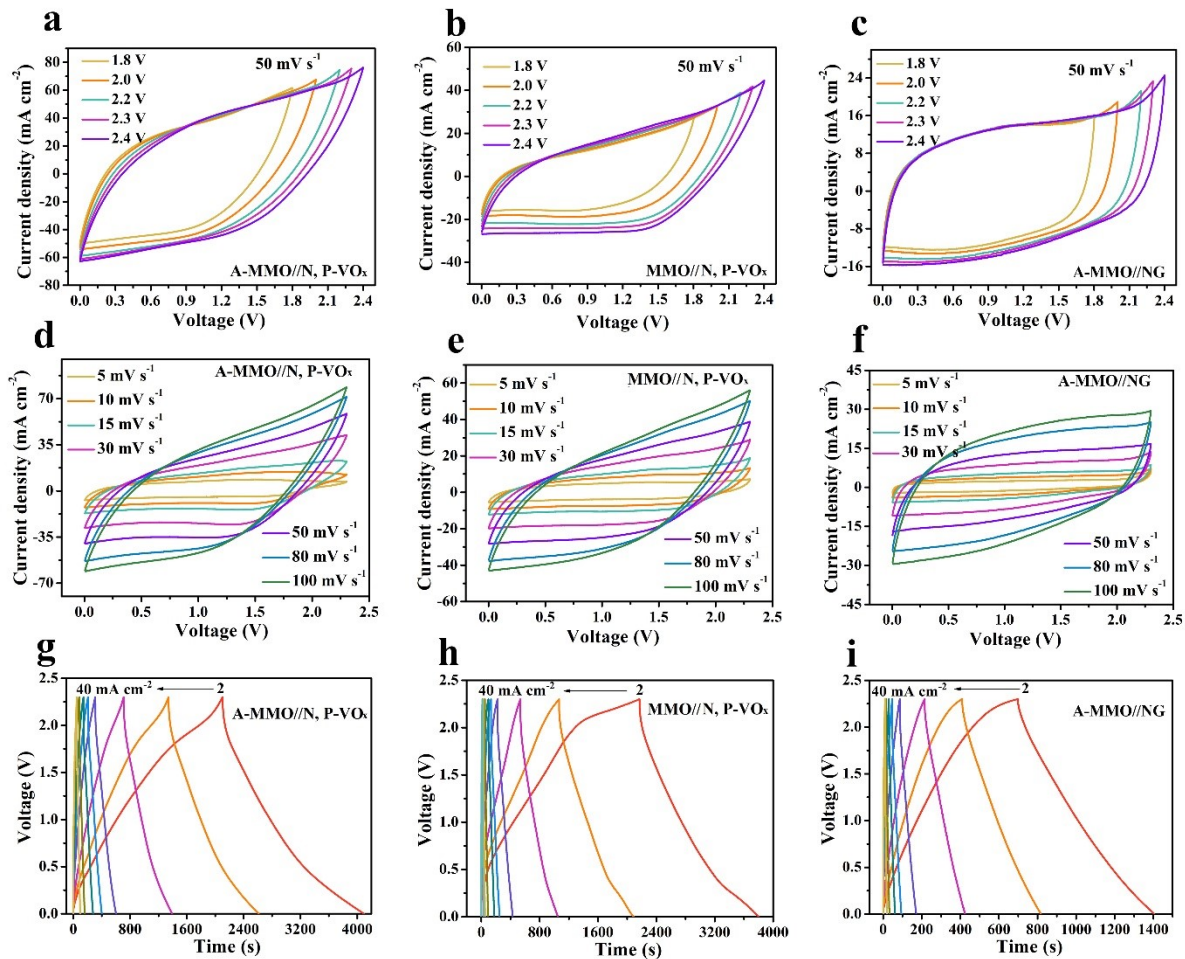

**Fig. S37** (a-c) CV curves tested at different voltage windows. (d-f) CV curves at different scan rates. (g-i) GCD curves at different current densities of A-MMO//N, P-VO<sub>x</sub>, MMO//N, P-VO<sub>x</sub>, and A-MMO//NG devices.

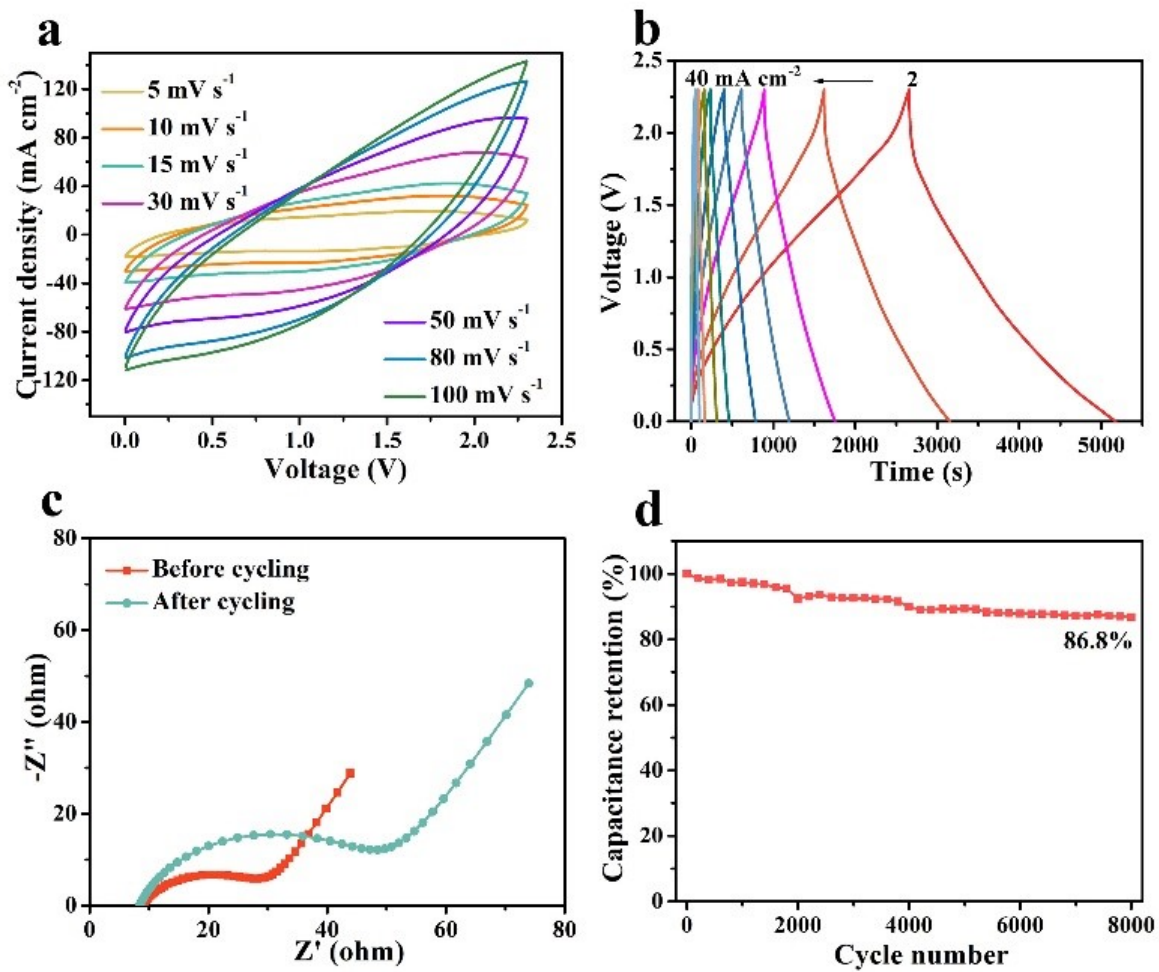

**Fig. S38** The electrochemical performance of the A-MMO-25//N, P-VO<sub>x</sub>-60 pseudocapacitor. (a) CV curves at different scan rates. (b) GCD curves at different current densities. (c) EIS plots before and after cycling. (d) Cycling stability.

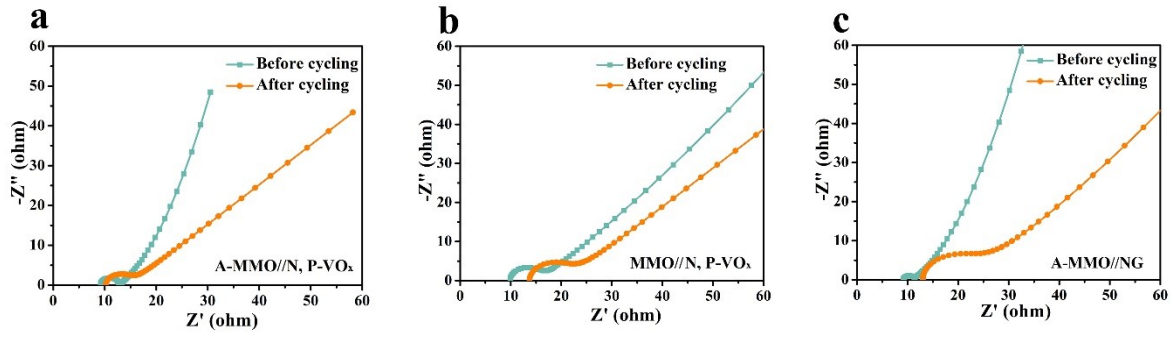

**Fig. S39** EIS curves of (a) A-MMO//N, P-VO<sub>x</sub>, (b) MMO//N, P-VO<sub>x</sub>, and (c) A-MMO//NG devices before and after cycling.

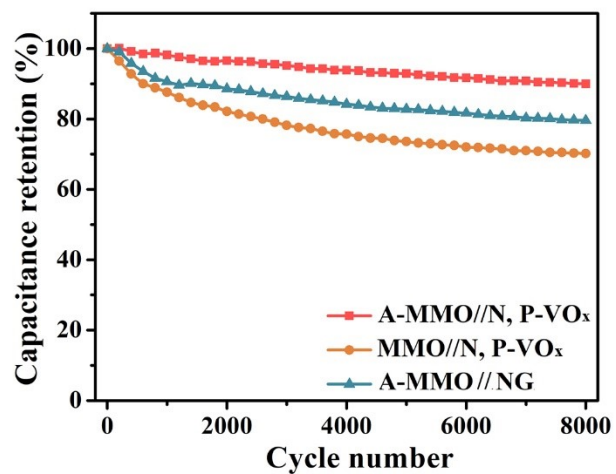

**Fig. S40** Cycling stability of A-MMO//N, P-VO<sub>x</sub>, MMO//N, P-VO<sub>x</sub> and A-MMO//NG devices.

**Table S1.** Values of the amplitude reduction factors ( $S_0^2$ ), coordination numbers (CN), energy shift ( $E_0$ ), Debye-Waller factors ( $\sigma^2$ ), interatomic distance (R) and R factor obtained from Mn K-edge FT-EXAFS spectra of MMO and A-MMO

| Samples | Bonds | $S_0^2$ | CN   | $\sigma^2$ ( $\text{\AA}^2$ ) | $E_0$ (eV) | R ( $\text{\AA}$ ) | R factor |
|---------|-------|---------|------|-------------------------------|------------|--------------------|----------|
| MMO     | Mn-O  | 0.8     | 4.51 | 0.00687                       | -2.277     | 1.884              | 0.0179   |
|         | Mn-Mn | 0.8     | 3.27 | 0.00893                       | -2.277     | 2.88               |          |
| A-MMO   | Mn-O  | 0.8     | 4.33 | 0.00587                       | -2.244     | 1.887              | 0.0228   |
|         | Mn-Mn | 0.8     | 2.89 | 0.00763                       | -2.244     | 2.878              |          |

**Table S2.** Areal capacitances of A-MMO, MMO, A-MMO-100, A-MMO-120, A-MMO-160, and A-MMO-25 at various current densities

| Samples             | 2    | 3    | 5    | 10   | 15   | 20   | 30   | 50   | 60   | Current density (mA cm <sup>-2</sup> ) |
|---------------------|------|------|------|------|------|------|------|------|------|----------------------------------------|
| MnO <sub>2</sub>    | 413  | 325  | 227  | 114  | 68   | 45   | N    | N    | N    | Capacitance (mF cm <sup>-2</sup> )     |
| Mo-MnO <sub>2</sub> | 1334 | 1127 | 991  | 791  | 668  | 582  | 422  | 232  | 201  |                                        |
| F-MnO <sub>2</sub>  | 1089 | 1064 | 1005 | 909  | 805  | 728  | 628  | 455  | 408  |                                        |
| MMO                 | 2084 | 1966 | 1860 | 1535 | 1394 | 1244 | 954  | 518  | 360  |                                        |
| A-MnO <sub>2</sub>  | 455  | 442  | 435  | 418  | 382  | 364  | 326  | 249  | 216  |                                        |
| A-MMO               | 2480 | 2375 | 2255 | 2124 | 1978 | 1858 | 1702 | 1364 | 1266 |                                        |
| A-MMO-100           | 2302 | 2228 | 2114 | 1873 | 1664 | 1509 | 1227 | 847  | 737  |                                        |
| A-MMO-120           | 2416 | 2269 | 2136 | 1964 | 1828 | 1673 | 1473 | 1141 | 982  |                                        |
| A-MMO-160           | 2095 | 2024 | 1918 | 1778 | 1683 | 1600 | 1457 | 1219 | 1124 |                                        |
| A-MMO-25            | 3160 | 2894 | 2684 | 2358 | 2212 | 1895 | 1631 | 1255 | 1034 |                                        |



**Table S3.** Cell parameters of A-MMO during the charging/discharging process.

|      | a (Å)  | b (Å)  | c (Å)  | Cell volume (Å <sup>3</sup> ) |
|------|--------|--------|--------|-------------------------------|
| C0   | 5.0435 | 2.8576 | 7.3917 | 102.4945                      |
| C0.2 | 4.9294 | 2.8561 | 7.3882 | 100.2276                      |
| C0.4 | 4.9074 | 2.8522 | 7.3657 | 99.2147                       |
| C0.6 | 4.8110 | 2.8522 | 7.3398 | 96.5144                       |
| C0.8 | 4.7714 | 2.8522 | 7.3458 | 95.7111                       |
| C1   | 4.7260 | 2.8522 | 7.3310 | 94.7309                       |
| C1.1 | 4.7154 | 2.8456 | 7.3212 | 93.8200                       |
| D1   | 4.7436 | 2.8482 | 7.3950 | 95.8380                       |
| D0.8 | 4.8353 | 2.8495 | 7.4175 | 97.7359                       |
| D0.6 | 4.8755 | 2.8548 | 7.4154 | 98.7685                       |
| D0.4 | 4.9275 | 2.8565 | 7.4152 | 100.0625                      |
| D0.2 | 4.9226 | 2.8561 | 7.4459 | 100.4368                      |
| D0   | 4.9713 | 2.8667 | 7.4476 | 102.5243                      |

**Table S4.** Areal capacitances of N, P-VO<sub>x</sub>, N-VO<sub>x</sub>, P-VO<sub>x</sub>, and V<sub>2</sub>O<sub>5</sub> at various current densities

| Samples                       | 2    | 3    | 5    | 10   | 15   | 20   | 30   | 50   | 60   | Current density (mA cm <sup>-2</sup> ) |
|-------------------------------|------|------|------|------|------|------|------|------|------|----------------------------------------|
| N, P-VO <sub>x</sub>          | 2490 | 2450 | 2376 | 2233 | 2138 | 2057 | 1840 | 1458 | 1300 | Capacitance (mF cm <sup>-2</sup> )     |
| N-VO <sub>x</sub>             | 2057 | 1421 | 1200 | 967  | 825  | 750  | 645  | 246  | 525  |                                        |
| P-VO <sub>x</sub>             | 1275 | 1145 | 983  | 783  | 663  | 583  | 475  | 333  | 250  |                                        |
| V <sub>2</sub> O <sub>5</sub> | 1156 | 997  | 866  | 643  | 531  | 450  | 350  | 235  | 196  |                                        |

**Table S5.** Electrochemical performance comparison of A-MMO and N, P-VO<sub>x</sub> with other electrodes

| Electrodes                                         | Capacitance<br>(F cm <sup>-2</sup><br>@mA cm <sup>-2</sup> ) | Rate<br>performance<br>(@mA cm <sup>-2</sup> )                                              | Potential<br>window<br>(V) | Cycling performance       | Reference            |
|----------------------------------------------------|--------------------------------------------------------------|---------------------------------------------------------------------------------------------|----------------------------|---------------------------|----------------------|
| MoS <sub>2</sub> @α-Fe <sub>2</sub> O <sub>3</sub> | 2.08@2                                                       | 85.2%@20                                                                                    | -0.8-0                     | 91.5%@6000 cycles         | 10                   |
| V/Co oxides                                        | 1.83@8                                                       | 40.2%@80                                                                                    | 0-0.45                     | /                         | 11                   |
| NiMnLDH                                            | 2.11@2                                                       | 74%@20                                                                                      |                            | 93.5%@2000 cycles         | 12                   |
| CoNiO <sub>2</sub>                                 | 1.36@8                                                       | 83%@100                                                                                     | 0-0.45                     | 102%@40000 cycles         | 13                   |
| CoN-Ni <sub>3</sub> N                              | 1.48@0.5                                                     | 41.9%@30                                                                                    | 0-0.6                      | 93.3%@10000 cycles        | 14                   |
| Mxene                                              | 1.12@10<br>mV s <sup>-1</sup>                                | 66%@100<br>mV s <sup>-1</sup>                                                               | -0.6-0.3                   | 100%@10000 cycles         | 15                   |
| Zinc<br>manganese<br>oxide                         | 1.9@3                                                        | 55%@50                                                                                      | 0-1.2                      | 94.6%@10000 cycles        | 16                   |
| VN                                                 | 0.63@2                                                       | 42.3%@50                                                                                    | -1.2-0                     | 95.2%@10000 cycles        | 17                   |
| MnO <sub>2</sub><br>nanosheets                     | 1.43@1                                                       | 47.3%@50                                                                                    | 0-1                        | 98.4%@50,000 cycles       | 18                   |
| MnO <sub>2</sub> @textile<br>CNT                   | 0.53@1                                                       | 45.1%@50                                                                                    | 0-0.8                      | 99.7%@10000 cycles        | 19                   |
| film@MnO <sub>2</sub>                              | 1.1@1                                                        | 63.6%@15                                                                                    | 0-1.2                      | 92%@2000 cycles           | 20                   |
| Na-doped<br>MnO <sub>2</sub>                       | 0.73@1                                                       | 71.2%@10                                                                                    | 0-1.2                      | 92.1%@5000 cycles         | 21                   |
| VO <sub>x</sub>                                    | 1.57@2                                                       | 31.2%@40                                                                                    | 0.9-0                      | no loss@20000 cycles      | 22                   |
| W <sub>2</sub> N                                   | 0.77@2                                                       | 63%@20                                                                                      | -0.6-0.6                   | 92%@10000 cycles          | 23                   |
| Ni <sub>3</sub> P                                  | 1.76@5                                                       | 63.8%@20                                                                                    | -0.2-0.6                   | 86%@4000 cycles           | 24                   |
| PPy@MnO <sub>2</sub>                               | 1.24@2                                                       | 57.2%@20                                                                                    | 0-1                        | /                         | 25                   |
| Co <sub>3</sub> O <sub>4</sub>                     | 1.22@0.5                                                     | 59%@20                                                                                      | 0-0.5                      | 98.2%@4000 cycles         | 26                   |
| VN                                                 | 0.72@1                                                       | 68.8%@10                                                                                    | -1-0.2                     | /                         | 27                   |
| ZnCo <sub>2</sub> O <sub>4</sub> @Zn-<br>Co-S      | 1.35@0.5                                                     | 40%@2                                                                                       | 0-0.45                     | /                         | 28                   |
| Cu-MOF                                             | 0.25@1.25                                                    | 83.1%@5                                                                                     | 0-0.5                      | 87%@4000 cycles           | 29                   |
| N-VO <sub>2</sub>                                  | 1.013@1 A<br>cm <sup>-3</sup>                                | 63.8@10 A<br>cm <sup>-3</sup>                                                               | 0-0.8                      | /                         | 30                   |
| <b>A-MMO</b>                                       | <b>2.48@2</b>                                                | <b>85.6%@10</b><br><b>74.9%@20</b><br><b>55.0%@50</b><br><b>51.0%@60</b><br><b>89.7%@10</b> | <b>0-1.1</b>               | <b>96.0%@10000 cycles</b> | <b>This<br/>work</b> |
| <b>N, P-VO<sub>x</sub></b>                         | <b>2.49@2</b>                                                | <b>82.6%@20</b><br><b>58.6%@50</b><br><b>52.2%@60</b>                                       | <b>-1.2-0</b>              | <b>89.5%@10000 cycles</b> |                      |

**Table S6.** Electrochemical performance comparison of SCs in this work

| SCs                                | Mass loading of two electrodes in total (mg cm <sup>-2</sup> ) | Thickness (mm) | Volumetric energy density (mWh cm <sup>-3</sup> ) | Volumetric power density (mW cm <sup>-3</sup> ) |
|------------------------------------|----------------------------------------------------------------|----------------|---------------------------------------------------|-------------------------------------------------|
| A-MMO//N, P-VO <sub>x</sub>        | 12.5                                                           | 0.8            | 15.82                                             | 29                                              |
| A-MMO-25//N, P-VO <sub>x</sub> -60 | 18.6                                                           | 0.9            | 17.90                                             | 26                                              |
| MMO//N, P-VO <sub>x</sub>          | 13.2                                                           | 0.9            | 11.63                                             | 26                                              |
| A-MMO//NG                          | 20.4                                                           | 1              | 4.68                                              | 23                                              |

**Table S7.** Electrochemical performance comparison of the A-MMO//N, P-VO<sub>x</sub> device with other SCs

| SCs                                                               | Voltage window (V) | Energy density (mWh cm <sup>-3</sup> ) | Power density (mW cm <sup>-3</sup> ) | Reference        |
|-------------------------------------------------------------------|--------------------|----------------------------------------|--------------------------------------|------------------|
| K <sup>+</sup> /Na <sup>+</sup> inserted MnO <sub>2</sub> //C     | 2.5                | 1.43                                   | 7.9                                  | 31               |
| MnO <sub>x</sub> //VO <sub>x</sub>                                | 2.2                | 5                                      | 22                                   | 32               |
| MnO <sub>2</sub> //Fe <sub>2</sub> O <sub>3</sub>                 | 2                  | 0.64                                   | 14.8                                 | 33               |
| MnO <sub>2</sub> //reduced CC                                     | 4                  | 3.82                                   | 24.6                                 | 34               |
| PPy@MnO <sub>2</sub> //Fe <sub>2</sub> O <sub>3</sub>             | 2                  | 1.93                                   | 9.8                                  | 25               |
| ZnCo <sub>2</sub> O <sub>4</sub> //Fe <sub>3</sub> O <sub>4</sub> | 2                  | 2.32                                   | 33.3                                 | 35               |
| MnO <sub>2</sub> //TiO <sub>2</sub>                               | 2.6                | 4.75                                   | 13                                   | 18               |
| MnO <sub>2</sub> //Fe <sub>2</sub> O <sub>3</sub>                 | 2.1                | 4.1                                    | 22.3                                 | 20               |
| MnO <sub>2</sub> //VN                                             | 2.4                | 8.3                                    | 34.3                                 | 17               |
| MnO <sub>2</sub> //V <sub>2</sub> O <sub>5</sub>                  | 2.4                | 6.24                                   | 33                                   | 16               |
| symmetric VO <sub>x</sub>                                         | 1.5                | 7.7                                    | 39                                   | 36               |
| W <sub>2</sub> N//PPy                                             | 1.6                | 1.9                                    | 232                                  | 23               |
| CoNiO <sub>2</sub> //C                                            | 1.5                | 1.4                                    | 24                                   | 13               |
| CoS <sub>2</sub> //C                                              | 1.6                | 3.16                                   | 37.3                                 | 37               |
| MnO <sub>2</sub> //V <sub>2</sub> O <sub>5</sub>                  | 2                  | 8.25                                   | 280                                  | 38               |
| symmetric Fe <sub>2</sub> O <sub>3</sub>                          | 1.8                | 9.2                                    | 12                                   | 39               |
| PPy@MnO <sub>2</sub> //C                                          | 1.8                | 8.69                                   | 12.35                                | 40               |
| NiO <sub>x</sub> //FeO <sub>x</sub>                               | 1.6                | 6.19                                   | 334.15                               | 41               |
| Ni-Co-N//C                                                        | 1.5                | 4.78                                   | 150                                  | 42               |
| <b>A-MMO//N, P-VO<sub>x</sub></b>                                 | <b>2.3</b>         | <b>15.82</b><br><b>7.57</b>            | <b>29</b><br><b>575</b>              | <b>This work</b> |

**Table S8.** Electrochemical performance and properties of the A-MMO//N, P-VO<sub>x</sub> device with other SCs

| Cells                                                   | State                       | Electrolyte                             | Mass loading of active materials (mg cm <sup>-2</sup> ) | Thickness (mm)            | Areal energy density (mWh cm <sup>-2</sup> ) | Reference        |
|---------------------------------------------------------|-----------------------------|-----------------------------------------|---------------------------------------------------------|---------------------------|----------------------------------------------|------------------|
| MoS <sub>2</sub> //MnO <sub>2</sub>                     | Solid-state SC              | PVA/Na <sub>2</sub> SO <sub>4</sub>     | 19.7 of MnO <sub>2</sub>                                | /                         | 1.5                                          | 43               |
| Symmetric graphene                                      | Aqueous SC                  | 6 M KOH                                 | 42                                                      | 1.02 (electrode scale)    | 0.52                                         | 44               |
| MnO <sub>2</sub> //V <sub>2</sub> O <sub>5</sub>        | Solid-state SC              | PVA/Na <sub>2</sub> SO <sub>4</sub>     | 21.6                                                    | 1.04 (device scale)       | 0.83                                         | 38               |
| Symmetric graphene/MnO <sub>2</sub>                     | Aqueous SC                  | 3 M LiCl                                | 364.4                                                   | 8 (electrode scale)       | 1.56                                         | 45               |
| MnO <sub>2</sub> //activated carbon                     | Aqueous SC                  | 1 M Na <sub>2</sub> SO <sub>4</sub>     | 105                                                     | 1 (electrode scale)       | 1.6                                          | 46               |
| MnO <sub>2</sub> /GA//GA                                | Aqueous SC                  | 3 M LiCl                                | 31.6                                                    | 2 (electrode scale)       | 0.65                                         | 47               |
| Symmetric Ti <sub>3</sub> C <sub>2</sub> T <sub>x</sub> | Aqueous SC                  | 3 M H <sub>2</sub> SO <sub>4</sub>      | 32.36                                                   | 0.7 (electrode scale)     | 0.337                                        | 48               |
| MnO <sub>2</sub> //carbon                               | Solid-state SC              | PVA/LiCl                                | 33.4                                                    | 0.9 (device scale)        | 0.841                                        | 49               |
| CNT//CNT/PPy                                            | Solid-state SC              | PVA/LiCl                                | 55.1                                                    | /                         | 1.42                                         | 50               |
| <b>A-MMO//N, P-VO<sub>x</sub></b>                       | <b>Quasi solid-state SC</b> | <b>PVA/Na<sub>2</sub>SO<sub>4</sub></b> | <b>12.5</b>                                             | <b>0.8 (device scale)</b> | <b>1.27</b>                                  | <b>This work</b> |
| <b>A-MMO-25//N, P-VO<sub>x</sub>-60</b>                 | <b>Quasi solid-state SC</b> | <b>PVA/Na<sub>2</sub>SO<sub>4</sub></b> | <b>18.6</b>                                             | <b>1 (device scale)</b>   | <b>1.61</b>                                  |                  |

Note: Thickness of the device refers to the total thickness of negative and positive electrodes, separator, and electrolyte.

## References

- 1 B. Ravel and M. Newville, *J. Synchrotron Radiat.*, 2005, **12**, 537–541.
- 2 X. Gao, X. Dong, Z. Xing, C. Nie, G. Zheng and Z. Ju, *Adv. Mater. Technol.*, 2021, **6**, 2100207.
- 3 G. Kresse and J. Furthmüller, *Comput. Mater. Sci.*, 1996, **6**, 15–50.
- 4 G. Kresse and J. Furthmüller, *Phys. Rev. B*, 1996, **54**, 11169.
- 5 J. P. Perdew, K. Burke and M. Ernzerhof, *Phys. Rev. Lett.*, 1996, **77**, 3865–3868.
- 6 J. D. Pack and H. J. Monkhorst, *Phys. Rev. B*, 1977, **16**, 1748–1749.
- 7 L. Zhu, J. Wang, S. Rong, H. Wang and P. Zhang, *Appl. Catal. B Environ.*, 2017, **211**, 212–221.
- 8 J. Wang, J. Polleux, J. Lim and B. Dunn, *J. Phys. Chem. C*, 2007, **111**, 14925–14931.
- 9 S. Chen, H. Yu, L. Chen, H. Jiang and C. Li, *Chem. Eng. J.*, 2021, **423**, 130208.
- 10 P. Man, Q. Zhang, Z. Zhou, M. Chen, J. Yang, Z. Wang, Z. Wang, B. He, Q. Li, W. Gong, W. Lu, Y. Yao and L. Wei, *Adv. Funct. Mater.*, 2020, **30**, 2003967.
- 11 G. Nie, X. Zhao, J. Jiang, Y. Luan, J. Shi, J. Liu, Z. Kou, J. Wang and Y. Z. Long, *Chem. Eng. J.*, 2020, **402**, 126294.
- 12 J. Q. Xie, L. Jiang, J. Chen, D. Mao, Y. Ji, X. Z. Fu, R. Sun and C. P. Wong, *Chem. Eng. J.*, 2020, **393**, 124598.
- 13 R. Guo, J. Li, Y. Jia, F. Xin, J. Sun, L. Dang, Z. Liu and Z. Lei, *J. Mater. Chem. A*, 2019, **7**, 4165–4174.
- 14 K. Li, B. Zhao, H. Zhang, H. Lv, J. Bai, H. Ma, P. Wang, W. Li, J. Si, X. Zhu and Y. Sun, *Adv. Funct. Mater.*, 2021, **31**, 2103073.
- 15 Y. Wang, X. Wang, X. Li, X. Li, Y. Liu, Y. Bai, H. Xiao and G. Yuan, *Adv. Funct. Mater.*, 2021, **31**, 2008185.
- 16 L. Lyu, C. W. Kim, K. dong Seong, J. Kang, S. Liu, Y. Yamauchi and Y. Piao, *Chem. Eng. J.*, 2022, **430**, 133115.
- 17 G. Qu, Z. Wang, X. Zhang, S. Zhao, C. Wang, G. Zhao, P. Hou and X. Xu, *Chem. Eng. J.*, 2022, **429**, 132406.
- 18 Y. J. Gu, W. Wen and J. M. Wu, *J. Power Sources*, 2020, **469**, 228425.
- 19 R. Liu, Y. Wang, G. Yuan, Y. Liu, X. Li, Y. Bai and Y. Wang, *Electrochim. Acta*, 2019, **299**, 12–18.
- 20 Y. Zhang, X. Yuan, W. Lu, Y. Yan, J. Zhu and T. W. Chou, *Chem. Eng. J.*, 2019, **368**, 525–532.
- 21 Q. Zong, Q. Zhang, X. Mei, Q. Li, Z. Zhou, D. Li, M. Chen, F. Shi, J. Sun, Y. Yao and Z. Zhang, *ACS Appl. Mater. Interfaces*, 2018, **10**, 37233–37241.
- 22 K. Zheng, Y. Zeng, S. Liu, C. Zeng, Y. Tong, Z. Zheng, T. Zhu and X. Lu, *Energy Storage Mater.*, 2019, **22**, 410–417.
- 23 D. P. Dubal, N. R. Chodankar and S. Qiao, *Small*, 2019, **15**, 1804104.

- 24 P. Sun, M. Qiu, J. Huang, J. Zhao, L. Chen, Y. Fu, G. Cui and Y. Tong, *Chem. Eng. J.*, 2020, **380**, 122621.
- 25 P. Zhao, N. Wang, M. Yao, H. Ren and W. Hu, *Chem. Eng. J.*, 2020, **380**, 122488.
- 26 C. Young, J. Wang, J. Kim, Y. Sugahara, J. Henzie and Y. Yamauchi, *Chem. Mater.*, 2018, **30**, 3379–3386.
- 27 Q. Zhang, X. Wang, Z. Pan, J. Sun, J. Zhao, J. Zhang, C. Zhang, L. Tang, J. Luo, B. Song, Z. Zhang, W. Lu, Q. Li, Y. Zhang and Y. Yao, *Nano Lett.*, 2017, **17**, 2719–2726.
- 28 J. Zhao, H. Li, C. Li, Q. Zhang, J. Sun, X. Wang, J. Guo, L. Xie, J. Xie, B. He, Z. Zhou, C. Lu, W. Lu, G. Zhu and Y. Yao, *Nano Energy*, 2018, **45**, 420–431.
- 29 R. Hou, M. Miao, Q. Wang, T. Yue, H. Liu, H. S. Park, K. Qi and B. Y. Xia, *Adv. Energy Mater.*, 2019, **9**, 1901892.
- 30 J. Guo, L. Li, J. Luo, W. Gong, R. Pan, B. He, S. Xu, M. Liu, Y. Wang, B. Zhang, C. Wang, L. Wei, Q. Zhang and Q. Li, *Adv. Energy Mater.*, 2022, **12**, 2201481.
- 31 Y. Liu, L. Guo, X. Teng, J. Wang, T. Hao, X. He and Z. Chen, *Electrochim. Acta*, 2019, **300**, 9–17.
- 32 Y. Song, T. Liu, B. Yao, M. Li, T. Kou, Z. H. Huang, D. Y. Feng, F. Wang, Y. Tong, X. X. Liu and Y. Li, *ACS Energy Lett.*, 2017, **2**, 1752–1759.
- 33 D. Chen, S. Zhou, H. Quan, R. Zou, W. Gao, X. Luo and L. Guo, *Chem. Eng. J.*, 2018, **341**, 102–111.
- 34 J. Zhang, J. Sun, T. Ahmed Shifa, D. Wang, X. Wu and Y. Cui, *Chem. Eng. J.*, 2019, **372**, 1047–1055.
- 35 D. Kong, Y. Wang, S. Huang, J. Hu, Y. Von Lim, B. Liu, S. Fan, Y. Shi and H. Y. Yang, *Energy Storage Mater.*, 2019, **23**, 653–663.
- 36 A. Huang, M. F. El-Kady, X. Chang, M. Anderson, C. W. Lin, C. L. Turner and R. B. Kaner, *Adv. Energy Mater.*, 2021, **11**, 2100768.
- 37 W. Chen, T. Wei, L. E. Mo, S. Wu, Z. Li, S. Chen, X. Zhang and L. Hu, *Chem. Eng. J.*, 2020, **400**, 125856.
- 38 Z. H. Huang, Y. Song, D. Y. Feng, Z. Sun, X. Sun and X. X. Liu, *ACS Nano*, 2018, **12**, 3557–3567.
- 39 J. Li, Y. Wang, W. Xu, Y. Wang, B. Zhang, S. Luo, X. Zhou, C. Zhang, X. Gu and C. Hu, *Nano Energy*, 2019, **57**, 379–387.
- 40 J. Tao, N. Liu, L. Li, J. Su and Y. Gao, *Nanoscale*, 2014, **6**, 2922–2928.
- 41 Y. Wang, S. Su, L. Cai, B. Qiu, C. Yang, X. Tao and Y. Chai, *Energy Storage Mater.*, 2019, **20**, 315–323.
- 42 F. Liu, L. Zeng, Y. Chen, R. Zhang, R. Yang, J. Pang, L. Ding, H. Liu and W. Zhou, *Nano Energy*, 2019, **61**, 18–26.
- 43 J. M. Jeong, S. H. Park, H. J. Park, S. Bin Jin, S. G. Son, J. M. Moon, H. Suh and B. G. Choi, *Adv. Funct. Mater.*, 2021, **31**, 2009632.
- 44 L. Sheng, J. Chang, L. Jiang, Z. Jiang, Z. Liu, T. Wei and Z. Fan, *Adv. Funct. Mater.*, 2018, **28**,



1800597.

- 45 B. Yao, S. Chandrasekaran, J. Zhang, W. Xiao, F. Qian, C. Zhu, E. B. Duoss, C. M. Spadaccini, M. A. Worsley and Y. Li, *Joule*, 2019, **3**, 459–470.
- 46 C. Chen, Y. Zhang, Y. Li, J. Dai, J. Song, Y. Yao, Y. Gong, I. Kierzewski, J. Xie and L. Hu, *Energy Environ. Sci.*, 2017, **10**, 538–545.
- 47 B. Yao, S. Chandrasekaran, H. Zhang, A. Ma, J. Kang, L. Zhang, X. Lu, F. Qian, C. Zhu, E. B. Duoss, C. M. Spadaccini, M. A. Worsley and Y. Li, *Adv. Mater.*, 2020, **32**, 1906652.
- 48 J. Kong, H. Yang, X. Guo, S. Yang, Z. Huang, X. Lu, Z. Bo, J. Yan, K. Cen and K. K. Ostrikov, *ACS Energy Lett.*, 2020, **5**, 2266–2274.
- 49 H. Wang, C. Xu, Y. Chen and Y. Wang, *Energy Storage Mater.*, 2017, **8**, 127–133.
- 50 R. Chen, H. Ling, Q. Huang, Y. Yang and X. Wang, *Small*, 2022, **18**, 2106356.
